# Supplementary material for: Alterations in the intrinsic properties of striatal cholinergic interneurons after dopamine lesion and chronic L-DOPA
Source: eLife. 2020 Jul 20;9:e56920. doi: 10.7554/eLife.56920 (PMC7380940; doi:10.7554/eLife.56920)
Supplement: Figure 1—source data 1. [file elife-56920-fig1-data1.xlsx]

## Sheet: Figure 1
	Figure 1b - frequency distribution					Figure 1c - firing rate (Hz)					Figure 1c - firing rate (Hz)					Figure 1d - sAP CV					Figure 1e - Action potential - current relationship																					Figure 1f - Firing rate (Hz) in response to dopamine
	average instaneous firing rate/neuron					histograms - same data as Fig 1b					+CNQX +APV +picrotoxin					CV of instanteous frequencies of sAP					AP frequency vs. injected current																					Timecourse for response to dopamine, 30 μM added from 3-8 minutes to slice
group	sham	6-OHDA	+chronic-LD		group	sham	6-OHDA	+chronic-LD		group	sham	6-OHDA	+chronic-LD		group	sham	6-OHDA	+chronic-LD		group	sham	6-OHDA	+chronic-LD																		group	sham	6-OHDA	+chronic-LD
N (cells)	83	81	87		N (cells)	83	81	87		N (cells)	13	11	13		N (cells)	83	80	87		N (cells)	11	16	18																		N (cells)	8	7	10
#mice	26	29	25		#mice	26	29	25		#mice	3	3	3		#mice	26	29	25		#mice	4	5	5																		#mice	3	2	3
Data	sham	6-OHDA	+chronic-LD		mean	2.579	1.675	3.455		mean	2.267	1.233	3.583		mean	0.3572	0.5717	0.3572		mean data		sham				6-OHDA				+chronic-LD											mean data		sham				6-OHDA
	6.5521	3.6704	5.238		95% CI lower	2.1	1.248	3.017		95% CI lower	1.756	0.08659	2.403		95% CI lower	0.3059	0.4784	0.2832			current(pA)	mean	std dev	SEM		mean	std dev	SEM		mean	std dev	SEM										time (min)	mean	std dev	SEM		mean	std dev	SEM
	0.9394	1.8503	3.21		95% CI upper	3.057	2.102	3.893		95% CI upper	2.777	2.378	4.763		95% CI upper	0.4085	0.665	0.4313			0	2.63636	1.68954	0.509415		0.875	1.20416	0.30104		3.27778	2.82438	0.665713										0.5	1.89052	1.02647	0.362914		0.998323	0.530723	0.200594
	5.7516	1.4069	2.845		std dev	2.192	1.932	2.055		std dev	0.8446	1.706	1.953		std dev	0.2348	0.4192	0.3476			50	8.36364	3.38446	1.02045		7.8125	2.68871	0.672178		10.1667	3.12956	0.737643										1	1.85766	1.02726	0.36319		1.02606	0.516927	0.19538
	2.302	0.3399	2.29		SEM	0.2406	0.2146	0.2203		SEM	0.2343	0.5143	0.5417		SEM	0.02578	0.04687	0.03727			100	17.8182	3.31114	0.998346		12.9375	3.29583	0.823958		16.2778	3.87762	0.913964										1.5	1.8821	1.01768	0.359804		1.11795	0.64407	0.243436
	1.0437	0.9487	5.223																		150	22.8182	3.3412	1.00741		16.5625	3.40527	0.851316		20.4444	4.85341	1.14396										2	1.88497	1.03681	0.366568		1.08856	0.597124	0.225692
	1.2114	0.7491	9.484		median	2.166	0.9578	3.191		median	2.213	0.791	3.228		median	0.259	0.4815	0.2344			200	28	4.42719	1.33485		19.5	4.24264	1.06066		24.1667	6.33617	1.49345										2.5	1.98734	0.960574	0.339614		1.04385	0.560194	0.211734
	4.0083	1.7984	3.498		95% CI lower	1.696	0.7822	2.739		95% CI lower	1.568	0.06662	2.161		95% CI lower	0.225	0.4337	0.1821			250	31.2727	3.97721	1.19917		22.0625	4.21851	1.05463		27	6.91971	1.63099										3	1.93357	0.962352	0.340243		1.11168	0.599572	0.226617
	2.1098	0.3762	5.474		95% CI upper	2.44	1.407	3.653		95% CI upper	2.93	1.457	5.431		95% CI upper	0.313	0.5474	0.2901			300	35.8182	2.78633	0.84011		26.0625	4.94596	1.23649		33.3889	6.9548	1.63926										3.5	1.94454	1.05821	0.374135		1.27659	0.833795	0.315145
	2.9998	0.6883	5.328		MAD	1.0414	0.6179	1.338		MAD	0.582807	0.527511	1.09411		MAD	0.1	0.1802	0.1022																								4	2.21035	1.12251	0.396866		1.73215	1.58074	0.597463
	0.9875	0.7946	3.01																	Stat. test	Two-way ANOVA - repeated measures				Factors:	Group	P = 0.0002															4.5	2.11003	1.15582	0.408645		2.09374	1.7294	0.653652
	7.3415	0.6997	5.258		Stat. test	Kruskal-Wallis test		P < 0.0001		Stat. test	Kruskal-Wallis test		P = 0.0007		Stat. test	Kruskal-Wallis test		P < 0.0001								Current	P < 0.0001															5	2.48293	1.30534	0.461508		2.31821	1.63133	0.616586
	3.5812	1.7606	2.99			Dunn's multiple comparison test					Dunn's multiple comparison test					Dunn's multiple comparison test																										5.5	2.41444	1.33113	0.470626		3.01356	1.545	0.583955
	4.2222	0.3134	5.831			sham vs. 6-OHDA		P = 0.0002			sham vs. 6-OHDA		P = 0.0424			sham vs. 6-OHDA		P = 0.0004								interaction	P < 0.0001															6	2.56337	1.35838	0.48026		3.1105	1.63846	0.61928
	0.8599	0.9578	4.963			sham vs. +chronic-LD		P = 0.0029			sham vs. +chronic-LD		P = 0.4890			sham vs. +chronic-LD		P = 0.8126																								6.5	2.35499	1.25093	0.442272		3.12795	1.48444	0.561067
	0.8053	1.025	3.885			6-OHDA vs. +chronic-LD		P < 0.0001			6-OHDA vs. +chronic-LD		P = 0.0005			6-OHDA vs. +chronic-LD		P < 0.0001				Tukey's multiple comparison test of group means																				7	2.38231	1.21026	0.427893		3.50937	1.6151	0.61045
	1.1241	0.9039	13.807																			Sham vs. 6-OHDA		P = 0.0003																		7.5	2.39196	1.30029	0.459722		3.42655	1.5846	0.598921
	1.42	0.7363	3.695		Data	sham	6-OHDA	+chronic-LD		Data	sham	6-OHDA	+chronic-LD		Data	sham	6-OHDA	+chronic-LD				Sham vs. +chronic-LD		P = 0.4173																		8	2.46854	1.59741	0.56477		3.61544	1.42168	0.537346
	1.4002	0.1798	2.057			6.5521	3.6704	5.238			1.86245	0.567461	2.6792			0.244	0.2903	0.0967				6-OHDA vs. +chronic-LD		P = 0.0040																		8.5	2.60566	2.13553	0.755025		3.51117	1.47829	0.558741
	0.1442	0.2791	5.569			0.9394	1.8503	3.21			1.56768	1.37154	3.22847			0.825	0.7385	0.1743																								9	2.50874	1.96597	0.695077		3.44189	1.39719	0.528088
	0.6846	0.3846	2.739			5.7516	1.4069	2.845			2.93007	0.066624	5.43095			0.143	0.1309	0.1		Data	sham																					9.5	2.47517	1.9365	0.684655		3.43364	1.52847	0.577706
	0.21	0.6213	3.387			2.302	0.3399	2.29			3.07337	1.45663	2.66373			0.058	0.8453	0.2137			current(pA)	1	2	3	4	5	6	7	8	9	10	11										10	2.47236	1.92096	0.679162		3.17499	1.47481	0.557427
	0.2344	1.0751	4.255			1.0437	0.9487	5.223			2.79555	0.263486	1.06368			0.159	0.2155	0.2463			0	0	3	3	4	0	1	5	3	4	2	4
	3.4161	1.3865	6.241			1.2114	0.7491	9.484			2.21274	6.15945	7.77405			0.171	0.1582	0.1821			50	7	14	6	9	10	8	8	8	14	5	3									Data	Sham		firing rate (Hz)
	1.145	0.3896	7.183			4.0083	1.7984	3.498			4.17876	0.845338	2.5822			0.103	0.4668	0.2344			100	15	22	22	15	18	14	15	22	21	17	15										time (min)	1	2	3	4	5	6	7
	2.2121	1.4362	5.162			2.1098	0.3762	5.474			2.32419	0.030265	4.83612			0.165	0.2966	0.4382			150	19	28	26	20	23	19	20	24	26	20	26										0.5	2.64585	0.270114	3.76611	1.46005	1.90795	1.53579	1.36877
	2.1655	2.4393	3.928			2.9998	0.6883	5.328			1.02162	0.7638	3.24088			0.313	0.9368	0.1354			200	24	34	28	23	28	23	24	27	30	31	36										1	2.7248	0.17773	3.61882	1.3517	2.02887	1.54233	1.33316
	1.0803	0.9177	3.442			0.9875	0.7946	3.01			2.49465	1.24202	0.925955			0.43	0.5518	0.2614			250	27	37	31	27	32	27	28	29	34	35	37										1.5	2.77731	0.268043	3.6602	1.33723	1.98182	1.5967	1.37193
	3.0527	0.6577	0.996			7.3415	0.6997	5.258			1.74607	0.790997	5.66807			0.221	0.0986	0.2781			300	33	40	36	31	40	35	36	33	37	36	37										2	2.88629	0.231965	3.63321	1.3042	1.7385	1.84446	1.32122
	0.593	2.9326	2.941			3.5812	1.7606	2.99			1.31943		2.16081			0.237	0.4121	0.1282																								2.5	2.91102	0.346674	3.5083	2.0538	2.06522	1.54456	1.36968
	0.7139	0.5989	1.396			4.2222	0.3134	5.831			1.94143		4.32258			0.317	0.5299	0.0797			6-OHDA																					3	3.06779	0.310078	3.05151	1.09802	2.09525	2.36951	1.33806
	0.8258	0.5201	3.454			0.8599	0.9578	4.963								0.402	0.1679	0.3518			current(pA)	1	2	3	4	5	6	7	8	9	10	11	12	13	14	15	16					3.5	3.22131	0.284046	3.44408	1.15638	2.3126	1.52303	1.46774
	0.6082	0.0658	2.65			0.8053	1.025	3.885								0.151	0.2683	0.172			0	0	0	0	0	1	4	0	1	2	0	3	1	1	1	0	0					4	3.50339	0.349797	3.45088	2.05151	3.20267	1.43376	1.47919
	1.4705	1.958	3.031			1.1241	0.9039	13.807								0.689	0.3552	0.266			50	4	7	8	10	9	11	8	12	8	12	8	7	8	6	3	4					4.5	3.43505	0.223439	3.56976	1.43116	2.99242	1.53944	1.52849
	2.1138	0.7711	1.38			1.42	0.7363	3.695								0.305	0.4891	0.3496			100	11	12	12	17	15	17	12	17	12	19	12	13	11	12	7	8					5	3.45522	0.349589	3.7482	1.25608	3.98113	3.15875	1.76908
	1.1982	4.1229	2.409			1.4002	0.1798	2.057								0.498	0.6369	0.1928			150	15	17	16	20	18	21	17	20	15	22	16	17	14	17	10	10					5.5	3.58482	0.193237	3.67832	1.52936	4.2187	1.99607	1.92737
	4.0352	1.4195	1.266			0.1442	0.2791	5.569								0.399	0.6376	0.2014			200	19	21	18	24	21	24	19	24	16	27	20	20	15	20	12	12					6	3.83461	0.440992	4.22685	1.72041	4.11141	1.87094	1.92512
	1.6388	0.2369	2.775			0.6846	0.3846	2.739								0.766	0.3435	0.3901			250	23	24	20	27	23	26	22	27	18	29	23	23	17	21	15	15					6.5	3.97422	0.414977	2.8198	1.41286	4.08937	1.75856	2.03829
	5.4901	4.0514	1.928			0.21	0.6213	3.387								0.633	0.6373	0.3526			300	28	29	31	25	27	32	29	31	19	31	28	27	18	25	18	19					7	3.86989	0.371446	3.31093	1.88896	3.72283	1.4068	2.0158
	0.8986	12.6563	4.531			0.2344	1.0751	4.255								0.489	0.0951	0.8806																								7.5	4.28614	0.496771	3.28631	1.57532	3.75353	1.287	2.05429
	2.012	0.7505	6.094			3.4161	1.3865	6.241								0.153	0.2798	0.1624			+chronic-LD																					8	5.05723	0.380873	3.41457	1.27286	4.02823	1.11932	1.99462
	2.7987	3.6841	0.756			1.145	0.3896	7.183								0.593	0.4973	0.1242			current(pA)	1	2	3	4	5	6	7	8	9	10	11	12	13	14	15	16	17	18			8.5	7.05632	0.31115	2.693	1.30969	4.09386	1.00388	2.05632
	2.0895	2.895	0.767			2.2121	1.4362	5.162								0.173	0.1634	0.1938			0	0	3	1	2	4	0	2	6	0	2	8	4	3	1	2	8	4	9			9	6.73131	0.408471	2.81709	1.36698	3.43987	0.997307	2.07393
	3.4772	2.1919	1.403			2.1655	2.4393	3.928								0.221	0.1515	0.3692			50	7	9	7	14	11	5	11	11	9	9	9	9	5	13	15	15	10	14			9.5	6.65085	0.346906	2.71955	1.18872	3.35469	1.22675	2.02469
	1.7621	1.6899	0.778			1.0803	0.9177	3.442								0.279	0.2326	0.1198			100	11	12	11	22	16	19	17	17	14	15	13	16	10	20	23	20	18	19			10	6.63134	0.238963	2.79405	1.41942	3.19001	1.21724	2.02732
	3.1809	0.0507	2.214			3.0527	0.6577	0.996								0.328	0.4594	0.3833			150	14	15	13	28	20	22	21	22	20	19	16	20	13	26	29	25	22	23
	1.2652	5.1649	2.74			0.593	2.9326	2.941								0.667	0.1889	0.1964			200	16	17	15	34	22	34	24	26	24	22	19	21	16	31	34	29	25	26			6-OHDA		firing rate (Hz)
	2.181	2.5798	3.823			0.7139	0.5989	1.396								0.752	0.5747	0.2854			250	17	21	18	37	24	35	25	30	27	26	20	24	18	37	39	32	28	28			time (min)	1	2	3	4	5	6	7
	1.6964	1.6105	3.459			0.8258	0.5201	3.454								1.059	0.7486	0.1619			300	28	24	24	46	26	38	35	33	35	33	33	35	23	46	43	35	34	30			0.5	0.111278	1.37067	0.929624	1.68134	0.996446	0.569648	1.32926
	3.3875	1.015	4.191			0.6082	0.0658	2.65								0.878	0.4826	0.7625																								1	0.295325	1.39717	0.965251	1.668	1.04467	0.412726	1.39925
	2.0808	5.1791	3.998			1.4705	1.958	3.031								0.694	0.3249	2.4632																								1.5	0.182435	1.46471	0.941283	1.79319	1.35668	0.358715	1.72864
	15.8032	2.2704	3.259			2.1138	0.7711	1.38								0.157	0.4803	0.1571																								2	0.219974	1.55023	0.950215	1.86356	1.11677	0.450704	1.46848
	2.9976	0.7994	4.48			1.1982	4.1229	2.409								0.152	0.9628	0.0859																								2.5	0.203116	1.41994	0.974495	1.71787	1.22752	0.387331	1.37667
	2.4561	3.112	3.191			4.0352	1.4195	1.266								0.487	0.2038	0.4028																								3	0.125518	1.56855	0.996645	1.68679	1.55013	0.496196	1.35793
	2.4916	3.1925	2.218			1.6388	0.2369	2.775								0.208	0.5488	0.1271																								3.5	0.393082	1.56318	0.94052	1.68645	1.29935	0.322204	2.73133
	1.5262	0.7589	6.33			5.4901	4.0514	1.928								0.48	0.4158	0.2814																								4	0.323287	3.61664	1.10176	2.16167	0.69594	0.175001	4.05075
	1.0617	0.2932	4.341			0.8986	12.6563	4.531								0.424	0.6534	0.1142																								4.5	0.529209	3.9822	1.67314	3.48047	0.818247	0.061136	4.11181
	3.9934	5.0593	3.782			2.012	0.7505	6.094								0.247	0.73	0.4314																								5	0.797282	3.76175	1.46437	3.56738	1.91022	0.228946	4.49755
	1.5163	0.7822	4.614			2.7987	3.6841	0.756								0.179	1.8227	0.8739																								5.5	0.448873	4.55306	2.21068	4.14168	2.97452	2.12159	4.64453
	1.8764	0.7262	3.653			2.0895	2.895	0.767								0.215	2.3074	0.6145																								6	0.111847	4.58183	2.48032	3.9976	3.06677	2.56316	4.97197
	3.0801	0.5291	1.081			3.4772	2.1919	1.403								0.257	1.7213	0.4671																								6.5	0.244925	4.52186	2.74018	3.81424	3.29309	2.69406	4.58731
	2.3178	0.2091	1.19			1.7621	1.6899	0.778								0.225	0.2084	0.5069																								7	0.571986	5.77229	2.97649	3.79398	3.75627	3.05739	4.6372
	4.8281	0.897	2.534			3.1809	0.0507	2.214								0.161		0.8758																								7.5	0.517967	5.52394	2.7519	3.96157	3.53642	3.10549	4.58854
	3.8374	0.4711	1.814			1.2652	5.1649	2.74								0.679	0.2502	0.3059																								8	0.901453	5.34635	3.09088	3.98246	3.89028	3.37558	4.72106
	2.4396	1.223	1.836			2.181	2.5798	3.823								0.319	0.5061	0.1523																								8.5	0.839683	5.58006	2.81727	3.60075	3.62428	3.51288	4.60322
	2.4135	0.207	2.629			1.6964	1.6105	3.459								0.257	0.5758	0.1322																								9	1.10254	5.57973	2.78206	3.26646	3.55872	3.2826	4.52113
	0.6704	0.2835	5.017			3.3875	1.015	4.191								0.225	0.4311	0.1657																								9.5	0.771113	5.80774	2.73452	3.46274	3.57369	3.3697	4.31597
	7.484	0.8814	1.131			2.0808	5.1791	3.998								0.3	0.4581	0.2892																								10	1.01533	5.91021	2.70108	2.83107	2.99103	2.92044	3.85574
	4.0538	1.7153	4.659			15.8032	2.2704	3.259								0.223	0.6253	0.154
	1.0151	0.9751	1.196			2.9976	0.7994	4.48								0.29	0.4851	0.1308																								+chronic-LD		firing rate (Hz)
	5.393	0.2296	3.556			2.4561	3.112	3.191								0.19	0.362	0.1702																								time (min)	1	2	3	4	5	6	7
	2.2425	1.0457	3.036			2.4916	3.1925	2.218								0.176	0.4778	0.8445																								0.5	1.77954	3.27595	2.07537	2.06808	4.60985	0.515763	3.85002
	1.8764	0.3427	2.692			1.5262	0.7589	6.33								0.882	0.5474	1.1137																								1	1.88961	3.24171	2.07559	2.25339	1.42945	0.629195	3.89222
	2.3946	1.2146	2.153			1.0617	0.2932	4.341								0.712	0.5299	0.1832																								1.5	1.69368	3.71722	1.92372	2.29419	1.95491	0.518941	3.74946
	1.4516	0.6643	1.562			3.9934	5.0593	3.782								0.255	0.1828	0.2646																								2	1.65017	3.65473	1.84508	2.21568	0.670029	0.58074	3.90547
	2.2536	1.6651	1.703			1.5163	0.7822	4.614								0.277	0.4525	0.1703																								2.5	1.59739	3.51194	1.82137	2.19963	1.73354	0.800801	3.92366
	3.2131	8.439	2.201			1.8764	0.7262	3.653								0.198	0.4408	0.1792																								3	1.58165	3.18482	1.79539	2.31637	2.54593	0.789058	3.91922
	4.81	2.8078	2.968			3.0801	0.5291	1.081								0.16	0.2904	0.6079																								3.5	2.20103	3.06474	2.11068	4.41626	2.54724	0.701543	3.97515
	0.1203	0.8123	4.943			2.3178	0.2091	1.19								0.763	0.5397	0.1703																								4	3.89636	7.09994	3.28044	5.20816	2.98078	0.204061	5.11781
	1.5776	1.9038	1.786			4.8281	0.897	2.534								0.214	0.9128	0.2901																								4.5	3.45649	6.74268	3.18239	4.62393	3.92001	0.263357	6.95461
	3.2374	4.3585	1			3.8374	0.4711	1.814								0.233	1.3905	0.6234																								5	3.63661	7.21036	3.10652	5.63973	2.81492	0.639739	6.52087
	5.7759	2.8945	1.608			2.4396	1.223	1.836								0.149	0.5843	0.5508																								5.5	4.16458	7.29634	3.03283	5.65122	3.66059	0.908968	6.77118
	2.7658		3.653			2.4135	0.207	2.629								0.137	0.6683	1.4157																								6	4.02877	6.76351	3.06963	5.30761	3.64348	1.18851	6.78169
	2.5205		1.853			0.6704	0.2835	5.017								0.652	0.3556	0.1523																								6.5	4.03666	6.86552	3.17786	5.80097	3.9195	1.12687	7.10687
			0.837			7.484	0.8814	1.131								0.097	0.2129	0.9186																								7	4.08081	6.83197	3.03071	5.63634	3.83359	1.49935	6.68818
			4.983			4.0538	1.7153	4.659								0.123	0.4337	0.1645																								7.5	3.56738	7.1369	3.26679	5.55907	3.29833	1.49958	7.02459
			7.173			1.0151	0.9751	1.196								0.193	0.4764	0.1765																								8	3.62862	6.74293	3.40784	5.34206	3.44793	1.7754	6.72437
			4.962			5.393	0.2296	3.556								0.293	0.8317	0.3907																								8.5	4.15146	4.96196	3.43047	5.23456	3.45389	1.70281	6.71904
						2.2425	1.0457	3.036								0.525	0.6171	0.176																								9	4.52203	4.38888	3.34213	5.05386	3.44898	1.97615	6.42135
						1.8764	0.3427	2.692								0.971	0.4856	0.1076																								9.5	2.98317	4.11454	3.09979	4.84415	3.1523	2.13421	7.34043
						2.3946	1.2146	2.153								0.35	0.3059	0.2615																								10	2.77264	4.30991	3.00571	4.64977	3.66044	1.69514	6.36964
						1.4516	0.6643	1.562								0.312	1.301	0.1872
						2.2536	1.6651	1.703								0.174	1.686	0.4001
						3.2131	8.439	2.201								0.269	1.5127	0.3105
						4.81	2.8078	2.968								0.234	0.1327	0.1586
						0.1203	0.8123	4.943								0.624	0.7057	0.1594
						1.5776	1.9038	1.786								0.561	0.4727	0.1854
						3.2374	4.3585	1								0.127	1.1747	0.3957
						5.7759	2.8945	1.608								0.106	0.8595	0.1821
						2.7658		3.653								0.259		0.3436
						2.5205		1.853								0.431		0.5768
								0.837										0.7997
								4.983										0.9155
								7.173										0.1072
								4.962										0.2113
[truncated: 3 more columns]

## Sheet: Figure 1-supplement 1
	Figure 1-figure supplement 1a - %steps with impaired paw						Figure 1-figure supplement 1b - dyskinesia score timecourse (ALO) @ first dose or at 3 weeks																										Figure 1-figure supplement 1c - Total dyskinesia score						Figure 1-figure supplement 1d - Dyskinesia score during first 10 minutes
	Impaired forepaw use after 6-OHDA						LID scores after L-DOPA injection																										Total dyskinesia score for test session
	lesion in lesion-only (6-OHDA) or lesion
	+ chronic L-DOPA treatment (+chronic-LD)					group	first dose	chronic LD																								group	fist dose	+chronic-LD				group	first dose	+chronic-LD
						N (mice)	11	23																								N (mice)	11	23				N (mice)	11	23
group	6-OHDA	+chronic-LD				#mice	11	23						Tukey's multiple comparison test																		#mice	11	23				#mice	11	23
N (mice)	21	30												P values
#mice	21	30				mean data		first dose			chronic LD			first dose vs.																		mean	45.05	42.28				mean	6	13.35
							minutes	mean	std dev		mean	std dev		chronic LD																		95% CI lower	38.99	35.14				95% CI lower	4.361	10.78
mean	9.574	8.753					0	0	0		0	0		>0.9999																		95% CI upper	51.1	49.43				95% CI upper	7.639	15.92
95% CI lower	7.672	7.289					5	0.136364	0.452267		3.58696	3.92733		0.0051																		std dev	9.018	16.52				std dev	2.439	5.949
95% CI upper	11.48	10.22					10	5.86364	2.08675		9.76087	2.96904		0.0009																		SEM	2.718	3.446				SEM	0.7355	1.241
std dev	4.178	3.92					20	11.0909	1.65557		10.6957	2.40614		>0.9999
SEM	0.9118	0.7157					40	11.5455	1.54037		8.47826	3.95278		0.0192																		median	47.5	42				median	6	14
							60	10.5	2.81957		7.15217	4.40927		0.0073																		95% CI lower	33.5	34				95% CI lower	4	9.5
median	9	8.957				Data	80	5.31818	2.86594		2.21739	3.98527		0.0171																		95% CI upper	52.5	49				95% CI upper	7	17
95% CI lower	6.542	7.273					100	0.272727	0.904534		0.391304	1.33107		>0.9999																		MAD	4	8.5				MAD	0.5	4
95% CI upper	12.09	10.64					120	0.318182	1.05529		0	0		>0.9999
MAD	2.47826	2.48611																														Stat. test	Mann-Whitney test (two tailed)			P = 0.2946		Stat. test	Mann-Whitney test (two tailed)			P = 0.0002
						stat. test	Two-way ANOVA repeated measures				Factors:	Group	P = 0.6092
Stat. test	Mann-Whitney test (two-tailed)			P = 0.5467								time	P < 0.0001																			Data	first dose	chronic LD				Data	first dose	chronic LD
	One sample Wilcoxon Signed Rank Test											interaction	P < 0.0001																				25.5	22.5					2	14
	6-OHDA vs. 50%		P < 0.0001																														50	13.5					6	3
	+chronic-LD vs. 50%		P < 0.0001					Tukey's multiple comparison			multiple differences between groups @ each time point																						43	44					4.5	14.5
											see above																						48.5	42					6.5	14.5
																																	33.5	18					6	2
Data	% steps taken with impaired forepaw						first L-DOPA dose																										52.5	31.5					6	9
	on suspended forepaw stepping task						minutes	1	2	3	4	5	6	7	8	9	10	11															43.5	34.5					4	11.5
	6-OHDA	+chronic-LD					0	0	0	0	0	0	0	0	0	0	0	0															48.5	56					6	23
	3.07692	11.6667					5	0	0	0	0	0	0	0	0	0	0	1.5															44.5	34					7	6.5
	10.8434	10					10	2	6	4.5	6.5	6	6	4	6	7	6	10.5															47.5	53					6	20
	12.5	6.15385					20	7	9.5	10.5	11.5	11	11.5	12	11.5	12.5	12	13															58.5	28.5					12	17.5
	11.25	14.8649					40	8	10	12	11.5	11.5	12.5	12	12	11	12.5	14																43.5						9.5
	12.0879	11.7647					60	5.5	10.5	10.5	11	5	12	11.5	12	10.5	13	14																31						10
	15.0538	11.1111					80	3	7.5	5.5	8	0	10.5	4	7	3.5	4	5.5																49						12
	11.2903	1.75439					100	0	3	0	0	0	0	0	0	0	0	0																43						17
	6.54206	6.94444					120	0	3.5	0	0	0	0	0	0	0	0	0																43						9.5
	9	14.2857																																41.5						9.5
	8.86076	5.82524					chronic L-DOPA (@ 3 weeks of daily treatment)																											37						14.5
	6.52174	8.06452					minutes	1	2	3	4	5	6	7	8	9	10	11	12	13	14	15	16	17	18	19	20	21	22	23				37						10
	7.86517	11.3924					0	0	0	0	0	0	0	0	0	0	0	0	0	0	0	0	0	0	0	0	0	0	0	0				60						23.5
	3.0303	8.82353					5	6.5	0	5	3	0	0	2.5	8.5	0	7.5	7	0	0	0	8	0	0	5	0	11	12	3.5	3				84						24
	8.53659	11.9403					10	7.5	3	9.5	11.5	2	9	9	14.5	6.5	12.5	10.5	9.5	10	12	9	9.5	9.5	9.5	10	12.5	12	13.5	12				75.5						17
	19.5122	9.72222					20	8.5	6	11	9.5	5.5	9	9	14.5	10	12.5	11	11	10	10.5	10	10.5	10	10.5	11.5	14.5	14	15	12				50.5						15
	5.12821	10.1266					40	0	2	9	9	3	8	8.5	9.5	10	10.5	0	11.5	6	11	10.5	10.5	10	10	5.5	11.5	14	14	11
	15.2174	9.09091					60	0	2.5	9.5	9	2.5	5.5	5.5	9	7.5	10	0	11.5	0	12.5	5.5	12.5	7	2	5	10.5	13.5	12.5	11
	12.8205	8.53659					80	0	0	0	0	5	0	0	0	0	0	0	0	5	3	0	0	5	0	5	0	13	13.5	1.5
	4.49438	3.7037					100	0	0	0	0	0	0	0	0	0	0	0	0	0	0	0	0	0	0	0	0	5.5	3.5	0
	8.33333	10.6383					120	0	0	0	0	0	0	0	0	0	0	0	0	0	0	0	0	0	0	0	0	0	0	0
	9.09091	4.10959
		1.5873
		7.40741
		8.69565
		1.5873
		5.71429
		18.1818
		11.4942
		7.27273
		10.1266

## Sheet: Figure 1-supplement 2
Burst-pause detection Burst and pauses were detected from spike train data using Robust Gaussian Surprise method (RGS) as indicated in methods.			Figure 1-figure supplement 2a - #burst/30s					Figure 1-figure supplement 2b - #burst/100 AP					Figure 1-figure supplement 2c - duration/burst (ms)					Figure 1-figure supplement 2d - #pauses/30s					Figure 1-figure supplement 2e - #pauses/100 AP					Figure 1-figure supplement 2f - duration/pause (ms)					Figure 1-figure supplement 2g - #burst/30s					Figure 1-figure supplement 2h - #burst/100 AP					Figure 1-figure supplement 2i - duration/burst (ms)					Figure 1-figure supplement 2j - #pause/30s
			#bursts from spike trains in Figure 1										of neurons exhibiting bursts.					#pauses from spike trains in Figure 1										of neurons exhibiting pauses.					#bursts from spike trains in Figure 6d										of neurons exhibiting bursts.					#pauses from spike trains in Figure 6d
		group	sham	6-OHDA	+chronic-LD		group	sham	6-OHDA	+chronic-LD		group	sham	6-OHDA	+chronic-LD		group	sham	6-OHDA	+chronic-LD		group	sham	6-OHDA	+chronic-LD		group	sham	6-OHDA	+chronic-LD		group	untreated	apamin+ZD	apamin		group	untreated	apamin+ZD	apamin		group	untreated	apamin+ZD	apamin		group	untreated	apamin+ZD
		N (cells)	83	81	87		N (cells)	83	81	87		N (cells)	66	52	80		N (cells)	83	81	87		N (cells)	83	81	87		N (cells)	75	64	85		N (cells)	17	8	10		N (cells)	17	8	10		N (cells)	17	6	10		N (cells)	17	8
		#mice	26	29	25		#mice	26	29	25		#mice	26	29	25		#mice	26	29	25		#mice	26	29	25		#mice	26	29	25		#mice	6	3	3		#mice	6	3	3		#mice	6	3	3		#mice	6	3
		mean	1.21	0.6324	1.886		mean	1.709	2.051	2.261		mean	0.6538	0.7112	0.5652		mean	3.877	2.119	4.835		mean	5.589	5.325	5.097		mean	2.131	3.402	1.339		mean	0.8665	0.2673	0.9715		mean	1.907	1.753	1.397		mean	1.133	0.5857	0.7836		mean	2.186	0.6676
		95% CI lower	0.9599	0.449	1.637		95% CI lower	1.42	1.501	1.874		95% CI lower	0.5668	0.5775	0.4934		95% CI lower	3.097	1.587	4.078		95% CI lower	4.874	4.456	4.483		95% CI lower	1.292	2.693	0.833		95% CI lower	0.5981	0.04358	0.5948		95% CI lower	1.416	-0.3394	1.004		95% CI lower	0.7914	0.1692	0.4645		95% CI lower	1.387	-0.1444
		95% CI upper	1.459	0.8158	2.134		95% CI upper	1.997	2.6	2.649		95% CI upper	0.7408	0.8449	0.6369		95% CI upper	4.657	2.651	5.592		95% CI upper	6.303	6.193	5.712		95% CI upper	2.971	4.11	1.845		95% CI upper	1.135	0.4909	1.348		95% CI upper	2.398	3.846	1.79		95% CI upper	1.474	1.002	1.103		95% CI upper	2.984	1.48
		std dev	1.144	0.8294	1.167		std dev	1.322	2.486	1.819		std dev	0.3538	0.4802	0.3222		std dev	3.572	2.405	3.552		std dev	3.271	3.928	2.882		std dev	3.649	2.837	2.346		std dev	0.522	0.2675	0.5266		std dev	0.9544	2.503	0.5491		std dev	0.6634	0.3969	0.446		std dev	1.553	0.9713
		median	1.005	0.52	1.809		median	1.629	1.316	1.97		median	0.6085	0.621	0.514		median	3.01	1.555	3.616		median	5.405	5.405	4.959		median	1.03	2.65	0.71		median	0.837	0.199	1.005		median	1.852	1.036	1.33		median	1.042	0.586	0.746		median	1.681	0.325
		95% CI lower	0.615	0.505	1.509		95% CI lower	1.379	0.909	1.714		95% CI lower	0.479	0.435	0.434		95% CI lower	2.438	1.04	3.075		95% CI lower	4.651	3.922	4.192		95% CI lower	0.88	1.88	0.6		95% CI lower	0.503	0	0.337		95% CI lower	1.563	0	0.7246		95% CI lower	0.529	0.11	0.324		95% CI lower	1.003	0
		95% CI upper	1.211	0.533	2.401		95% CI upper	2.027	2.083	2.419		95% CI upper	0.756	0.876	0.64		95% CI upper	3.566	2.042	5.265		95% CI upper	6.522	6.25	5.442		95% CI upper	1.2	3.35	0.91		95% CI upper	1.169	0.67	1.339		95% CI upper	2.222	7.692	1.905		95% CI upper	1.542	1.215	1.218		95% CI upper	3.339	2.846
		MAD	0.507	0.52	0.806		MAD	0.892	1.316	0.887		MAD	0.249	0.368	0.217		MAD	1.806	1.17	2.11		MAD	2.024	2.773	1.777		MAD	0.45	1.37	0.28		MAD	0.334	0.1445	0.333		MAD	0.3703	0.7955	0.25565		MAD	0.513	0.2715	0.329		MAD	1.004	0.325
		Stat. test	Kruskal-Wallis test		P < 0.0001		Stat. test	Kruskal-Wallis test		P = 0.0422		Stat. test	Kruskal-Wallis test		P = 0.2144		Stat. test	Kruskal-Wallis test		P < 0.0001		Stat. test	Kruskal-Wallis test		P = 0.4440		Stat. test	Kruskal-Wallis test		P < 0.0001		Stat. test	Kruskal-Wallis test		P = 0.0047		Stat. test	Kruskal-Wallis test		P = 0.1014		Stat. test	Kruskal-Wallis test		P = 0.1152		Stat. test	Kruskal-Wallis test
			Dunn's multiple comparison test					Dunn's multiple comparison test					Dunn's multiple comparison test					Dunn's multiple comparison test					Dunn's multiple comparison test					Dunn's multiple comparison test					Dunn's multiple comparison test					Dunn's multiple comparison test					Dunn's multiple comparison test					Dunn's multiple comparison test
			sham vs. 6-OHDA		P = 0.0018			sham vs. 6-OHDA		P > 0.9999			sham vs. 6-OHDA		P > 0.9999			sham vs. 6-OHDA		P = 0.0004			sham vs. 6-OHDA		P > 0.9999			sham vs. 6-OHDA		P < 0.0001			untreated vs. apamin+ZD		P = 0.0166			untreated vs. apamin+ZD		P = 0.1655			untreated vs. apamin+ZD		P = 0.1623			untreated vs. apamin+ZD
			sham vs. +chronic-LD		P = 0.0006			sham vs. +chronic-LD		P = 0.1395			sham vs. +chronic-LD		P = 0.4705			sham vs. +chronic-LD		P = 0.1225			sham vs. +chronic-LD		P = 0.6101			sham vs. +chronic-LD		P = 0.0177			untreated vs. apamin		P > 0.9999			untreated vs. apamin		P = 0.3623			untreated vs. apamin		P = 0.5375			untreated vs. apamin
			6-OHDA vs. +chronic-LD		P < 0.0001			6-OHDA vs. +chronic-LD		P = 0.0624			6-OHDA vs. +chronic-LD		P = 0.3724			6-OHDA vs. +chronic-LD		P < 0.0001			6-OHDA vs. +chronic-LD		P > 0.9999			6-OHDA vs. +chronic-LD		P < 0.0001			apamin+ZD vs. apamin		P = 0.0063			apamin+ZD vs. apamin		P > 0.9999			apamin+ZD vs. apamin		P > 0.9999			apamin+ZD vs. apamin
		Data	sham	6-OHDA	+chronic-LD		Data	sham	6-OHDA	+chronic-LD		Data	sham	6-OHDA	+chronic-LD		Data	sham	6-OHDA	+chronic-LD		Data	sham	6-OHDA	+chronic-LD		Data	sham	6-OHDA	+chronic-LD		Data	untreated	apamin+ZD	apamin		Data	untreated	apamin+ZD	apamin		Data	untreated	apamin+ZD	apamin		Data	untreated	apamin+ZD
			3.012	1.815	1.803			1.629	1.807	1.149			0.338	0.403	0.33			9.639	6.656	3.607			5.212	6.627	2.299			0.61	0.71	0.28			0.167	0	2.006			0.9091	0	2.5316			2.767	1.215	0.98			1.504	0
			0	1.226	2.422			0	2.857	2.581			0.616	0.48	0.799			0.644	0.613	9.688			6.667	1.429	10.323			26.2	1.54	0.66			1.169	0	1.003			1.6509	0	1.5666			0.22	0.64	0.603			1.67	0
			3.611	0.61	3.624			2.128	1.449	4.255			0.845	1.751	0.899			1.204	3.048	2.416			0.709	7.246	2.837			1.03	1.31	0.61			0.503	0.67	0.667			1.0033	1.7021	0.6873			2.021	0.11	0.324			2.685	2.846
			4.748	0	1.824			6.667	0	2.752			1.038	0.682	0.874			2.374	0	2.432			3.333	0	3.67			0.47	1.91	1.1			0.836	0.169	1.006			1.7361	1.1628	1.6043			1.315	0.78	1.639			3.51	0.676
			1.225	0.605	3.024			3.922	2.174	2.049			0.953	1.028	0.751			0.613	1.816	9.072			1.961	6.522	6.148			2.45	2.83	0.5			0.839	0.229	1.339			1.7301	0.9091	1.0959			0.922	0.237	0.662			0.839	0.458
			1.219	0.62	2.406			3.39	2.778	0.877			0.751	0.675	0.493			2.438	1.859	13.833			6.78	8.333	5.044			1.13	2.65	0.33			0.836	0.113	0.171			2.0161	7.6923	0.7246			1.672	0.532	0.83			1.003	0
			2.415	0	2.921			2.02	0	2.857			0.602	1.155	0.413			6.038	3.69	8.762			5.051	10	8.571			0.58	5.28	0.46			0.167	0.289	0.837			0.2584	0.5988	1.3263			1.042		1.017			4.68	0.192
			1.847	0	2.411			2.97	0	1.732			0.426	0.942	0.161			2.463	0.791	3.616			3.96	7.143	2.597			0.75	1.89	0.47			0.835	0.668	1.336			1.5625	1.9608	1.194			1.062		0.204			3.339	1.169
			3.032	0	2.401			3.597	0	1.527			0.746	1.245	0.345			1.819	0	9.602			2.158	0	6.107			0.49	2.08	0.28			1.839		1.013			1.8519		1.9048			0.32		0.359			5.184
			0.643	0.607	0.604			2.564	3.333	0.714			0.237	0.996	1.575			2.574	0.607	6.038			10.256	3.333	7.143			2.74	1.43	0.65			0.837		0.337			2.2222		1.3333			0.99		1.218			1.339
			3.61	0.63	0.605			1.714	2.941	0.412			0.746	1.468	0.01			15.645	2.52	7.865			7.429	11.765	5.35			0.26	1.88	0.38			1.505					2.6549					1.004					2.174
			1.207	0.52	2.419			1.183	1.149	2.721			0.505	0.478	0.831			6.035	2.082	4.233			5.917	4.598	4.762			0.66	2.56	0.48			1.172					2.5					0.529					0.335
			1.812	0	3.621			1.587	0	2.076			0.543	0.775	0.742			7.854	0	9.053			6.878	0	5.19			0.58	3.67	0.32			0.169					0.9174					1.542					2.2
			0.6	0	0.604			2.632	0	0.474			0.875	0.425	0.09			1.8	2.523	10.863			7.895	8.929	8.531			2.22	2.7	0.74			0.84					2.1834					1.64					1.681
			0.621	1.001	3.615			2.564	3.448	3.175			0.329	1.278	1.039			3.105	2.503	3.615			12.821	8.621	3.175			1.67	6.57	0.55			1.836					2.0036					0.47					4.341
			0.618	0	3.12			3.03	0	0.8			0.404	1.064	0.034			1.237	3.071	18.718			6.061	14.286	4.8			4.51	3.91	0.13			0.843					4.5872					0.48					0.675
			0.605	1.58	1.217			1.563	8.108	1.266			1.189	0.604	0.805			3.632	1.053	6.695			9.375	5.405	6.962			2.23	1.11	1.04			0.338					2.6316					1.257					0
			0.609	0	2.432			1.887	0	4.04			0.722	1.627	0.792			1.217	0	1.824			3.774	0	3.03			2.58	1.63	1.43
			0	0	1.809			0	0	1.124			0.025	0.876	0.289			0	0	10.249			0	0	6.367			5.54	6.43	0.32
			0	0.534	2.414			0	5	3.306			1.246	0.549	0.538			0.699	1.602	3.621			5.882	15	4.959			0.88	1.26	0.92
			0	0.518	3.027			0	3.448	3.333			0.4	1.505	0.726			0	0.518	6.054			0	3.448	6.667			0.8	0.64	0.66
			0	0.507	1.203			0	1.563	1.6			0.594	0.813	0.122			0	1.015	4.811			0	3.125	6.4			1.2	3.04	0.75
			2.406	0.511	4.219			2.395	1.316	2.31			0.801	0.964	0.369			3.609	2.042	6.027			3.593	5.263	3.3			2.06	4.79	0.4
			0.615	1.102	4.215			2.174	11.111	1.977			0.998	0.252	0.342			0	1.102	10.837			0	11.111	5.085			1.38	0.78	0.25
			1.213	0.505	3.622			1.869	1.19	2.419			0.802	1.126	0.326			3.034	3.032	9.055			4.673	7.143	6.048			6.93	8.66	0.43
			1.805	1.502	2.019			2.885	2.083	1.97			1.098	0.245	0.772			1.805	3.505	7.066			2.885	4.861	6.897			7.23	10.91	0.73
			0.624	0.518	3.513			2.041	1.961	3.431			1.106	0.077	0.762			1.873	1.555	3.513			6.122	5.882	3.431			0.95	1.63	0.44
			0.604	0.526	0.523			0.719	3.226	2.083			0.275	0.377	1.156			2.415	1.053	1.57			2.878	6.452	6.25			0.95	4.34	4.14
			0	2.025	2.522			0	2.367	2.994			0.82	0.097	0.568			0	3.544	3.531			0	4.142	4.192			0.85	12.87	1.08
			0.65	1.049	1.526			4.762	7.143	3.846			0.336	0.048	0.575			1.3	0.525	1.017			9.524	3.571	2.564			1.09	1.43	1.22
			0.669	0.538	1.008			5.263	5.556	1.075			0.386	0.058	0.346			0	0.538	3.528			0	5.556	3.763			0.89	0.38	1.13
			0	0	3.389			0	0	4.839			1.092	0.409	0.407			0	0	1.506			0	0	2.151			2.53	0.31	0.94
			0	1.515	3.505			0	2.778	5.932			1.061	0.509	0.239			2.718	2.019	1.002			13.636	3.704	1.695			1.07	6.08	1.01
			1.213	0	0			1.942	0	0			0.806	0.081	0.708			4.85	2.09	3.014			7.767	11.765	7.407			0.95	8.19	1.4
			1.211	0.558	3.012			3.39	1.408	4.167			0.144	0.356	0.77			0.606	1.117	1.004			1.695	2.817	1.389			0.89	6.51	0.55
			0.503	0.508	0.507			0.532	1.235	1.639			1.489	0.506	0.971			4.525	2.538	2.535			4.787	6.173	8.197			0.48	1	2.73
			0.502	0	2.01			1.053	0	2.439			0.413	1.015	0.305			2.508	0	2.512			5.263	0	3.049			1.12	0.42	0.94
			2.006	2.514	0			1.587	2.193	0			0.525	0.584	0.102			9.029	3.017	5.555			7.143	2.632	10.784			0.85	2.33	1.39
			0.517	5.537	2.009			2.174	1.713	1.493			0.921	0.36	0.484			1.552	12.082	6.531			6.522	3.738	4.851			1.92	2.96	0.45
			0.505	0.533	1.002			0.901	3.226	0.664			0.756	0.435	0.64			4.041	0	11.526			7.207	0	7.641			1.11	2.65	0.62
			1.005	0.525	1.662			1.25	2.083	13.636			0.001	1.122	0.678			5.528	1.574	0			6.875	6.25	0			1.04	0.78	2.5
			1.524	1.532	0.514			2.542	8.571	2.857			0.114	0.349	0.6			5.08	1.022	0			8.475	5.714	0			0.73	2.64	4.65
			1.511	1.03	1.02			1.523	4.651	2.857			1.043	0.638	0.486			7.554	2.061	1.02			7.614	9.302	2.857			1.2	3.68	1
			0.509	0.513	0			1.01	1.053	0			0.615	1.745	0.771			3.566	3.594	0.385			7.071	7.368	2.174			0.12	0.84	0.61
			1.505	0	1.13			1.613	0	1.863			0.623	1.016	0.522			6.02	0	2.637			6.452	0	4.348			0.67	1.2	0.47
			1.003	1.505	3.024			3.448	1.027	3.896			0.347	0.75	0.559			0.501	7.523	2.016			1.724	5.137	2.597			0.61	4.54	0.51
			1.506	0	3.384			2.521	0	3.01			0.983	1.701	0.179			3.514	5.049	4.888			5.882	10	4.348			0.61	0.53	0.49
			1.013	0	1.504			2.105	0	1.471			0.341	0.239	0.477			5.065	4.038	4.513			10.526	12.698	4.412			2.42	2.4	0.72
			1.005	0	3.504			1.058	0	2.857			0.902	0.695	0.493			10.054	2.035	6.508			10.582	8	5.306			8.27	4.45	0.59
			0	0.502	1.004			0	0.424	0.943			1.442	0.254	0.458			7.585	10.034	8.034			14.019	8.475	7.547			0.55	2.86	0.57
			2.001	0.501	1.505			0.442	1.099	1.571			1.239	0.095	0.255			20.512	3.006	3.01			4.535	6.593	3.141			1.2	3.64	0.7
			2.519	1.019	3.616			2.994	5	2.727			0.311	0.061	0.167			2.015	0.51	4.219			2.395	2.5	3.182			1.17	3.35	1.73
			1.016	0.507	0.502			1.418	0.637	0.541			0.451		0.434			3.047	8.627	4.017			4.255	10.828	4.324			0.75	1.34	0.25
			1.006	0	1.027			1.379	0	1.887			1.417		0.271			2.013	7.526	3.081			2.759	10.87	5.66			4.11	2.65	0.38
			1.022	0.52	2.009			2.667	3.03	1.13			0.486		1.03			1.533	1.561	6.53			4	9.091	3.672			0.4	10.36	0.54
			0.509	0	2.514			2.326	0	1.992			0.165		0.809			1.017	0	7.541			4.651	0	5.976			0.45	8.59	0.63
			1.114	3.014	1.008			1	2.034	0.952			0.438		0.294			8.91	7.535	7.556			8	5.085	7.143			0.93	1.7	0.6
			0.509	0.521	1.511			1.205	2.5	1.132			0.544		0.568			4.072	0.521	5.037			9.639	2.5	3.774			0.95	9.37	4.49
			2.001	0	2.011			3.704	0	1.887			0.3		0.646			3.502	1.511	5.53			6.481	8.824	5.189			9.59	5.74	1.68
			2.518	1.539	0.506			2.778	10	2.222			0.4		0.462			2.518	0.513	1.519			2.778	3.333	6.667			0.26	0.77	0.71
			0	0	0.509			0	0	1.449			0.763		0.708			2.565	0	2.546			7.353	0	7.246			0.54	4.55	0.91
			2.504	0.719	1.52			1.761	6.25	2.128			0.619		0.161			7.512	0	3.548			5.282	0	4.965			1.53	1.3	1.63
			2.512	0	1.511			2.294	0	3.03			0.449		0.563			8.039	0	0.504			7.339	0	1.01			0.5	3.97	2.26
			0.508	1.043	1.521			0.704	3.922	3.488			0.493		0.399			3.557	3.128	0.507			4.93	11.765	1.163			1.52	3.2	0.29
			1.006	0	1.922			1.408	0	3.731			0.225		1.613			3.019	0	3.075			4.225	0	5.97			14.02		18.42
			0	0.603	2.005			0	7.143	1.361			0.479		0.41			1.04	0	8.022			9.524	0	5.442			1.56		0.44
			5.513	0	0			2.466	0	0					0.407			4.511	1.533	0.552			2.018	6.122	4.762			1.48		1.18
			2.507	1.015	3.008			2.083	2.299	2.192					0.838			5.015	2.03	5.265			4.167	4.598	3.836			0.78		0.82
			0.516	1.04	2.022			1.724	3.922	5.714					1.252			1.548	1.04	1.011			5.172	3.922	2.857			1.02		0.64
			3.008	0	3.768			2.027	0	3.876					1.041			8.02	0	1.884			5.405	0	1.938			0.58		0.74
			0.504	0	1.51			0.971	0	1.714					0.817			2.015	0.547	5.537			3.883	3.03	6.286			3.75		1.4
			0	0	3.01			0	0	3.75					0.743			1.07	0.551	2.007			8.696	6.25	2.5			0.6		3.34
			0	0.523	1.512			0	1.587	2.439					0.509			6.033	3.664	1.512			10.345	11.111	2.439			0.25		1.62
			0.502	0.527	0.501			1.25	4.762	1.124					0.406			3.01	1.053	0.501			7.5	9.524	1.124			1.12		1.35
			1.512	0	0			2.29	0	0					0.983			2.521	0	7.6			3.817	0	18.987			1.72		0.74
			0	0	3.055			0	0	5.085					0.519			8.585	1.31	3.055			10	5.556	5.085					0.43
			2.007	0.755	1.508			1.471	0.909	1.724					0.3			9.033	3.396	3.519			6.618	4.091	4.023					0.85
			0	0.531	2.506			0	2.632	1.73					0.084			0	0.531	7.519			0	2.632	5.19					2.37
			0	0.505	1.003			0	0.943	1.923					0.316			2.57	3.031	4.011			8.475	5.66	7.692					0.95
			2.515	0	0			2.618	0	0					0.485			4.024	2.725	3.04			4.188	7.463	12					0.71
			3.007	0.522	1.503			1.749	1.064	3.191								10.526	3.134	3.006			6.122	6.383	6.383					4.23
			1.005		0.502			1.274		0.529								3.519		11.546			4.459		12.169					10.61
			0		0			0		0								5.565		2.154			9.821		6.897					0.38
					0.549					4.167										1.098					8.333					0.22
					2.513					1.908										3.519					2.672					0.55
					4.011					1.882										9.527					4.471
					1.509					1.075										8.552					6.093
[truncated: 9 more columns]

## Sheet: Figure 1-supplement 3
	Figure 1-figure supplement 3a - voltage-current relationship; recordings in the presence of TTX																					Figure 1-figure supplement 3b - RMP (in the presence of TTX)						Figure 1-figure supplement 3c - Input resistance, MΩ						Figure 1-figure supplement 3d - Capacitance, mF					Figure 1-figure supplement 3f - Rheobase, pA					Figure 1-figure supplement 3g and 3h - sAP traces and average
	voltage (mV) vs. injected current (pA)																					resting membrane potential, mV						Recordings in the presence of TTX						Recordings in the presence of TTX
group	sham	6-OHDA	+chronic-LD																		group	sham	6-OHDA	+chronic-LD			group	sham	6-OHDA	+chronic-LD			group	sham	6-OHDA	+chronic-LD		group	sham	6-OHDA	+chronic-LD		group	sham	6-OHDA	+chronic-LD
N (cells)	17	18	18																		N (cells)	19	33	34			N (cells)	18	12	19			N (cells)	20	23	27		N (cells)	20	21	27		N (cells)	22	22	27
#mice	7	5	5																		#mice	5	8	9			#mice	8	8	9			#mice	8	10	12		#mice	6	4	5		#mice	10	8	8
mean data		sham			6-OHDA			+chronic-LD													mean	-54.29	-54.61	-53.59			mean	304	284.5	296.4			mean	234.6	268.3	261.4		mean	19.52	12.79	15.57		mean data		sham			6-OHDA
	current (pA)	mean	std dev		mean	std dev		mean	std dev												95% CI lower	-58.55	-56.92	-55.81			95% CI lower	239.3	210.2	229.7			95% CI lower	202.6	233.1	226.9		95% CI lower	10.56	10.24	11.02			time (ms)	mean	stdev		mean	stdev
	-300	-79.7697	6.43589		-77.0005	6.33874		-79.2446	18.6078												95% CI upper	-50.03	-52.3	-51.37			95% CI upper	368.7	358.8	363			95% CI upper	266.5	303.5	296		95% CI upper	28.49	15.35	20.13			0	-45.2962	4.35375		-45.2608	5.37331
	-250	-77.1493	6.34071		-74.1562	6.14826		-75.3735	11.6877												std dev	8.835	6.517	6.363			std dev	130.1	116.9	138.3			std dev	68.26	81.37	87.36		std dev	19.16	5.606	11.52			0.4	-45.244	4.35799		-45.2128	5.38415
	-200	-74.4125	6.26626		-70.9737	6.68856		-72.3014	9.64828																																			0.8	-45.1843	4.35299		-45.1516	5.40941
	-150	-71.186	6.53903		-67.6619	6.95704		-68.9897	8.08323												median	-53.97	-56.11	-54.62			median	315.9	279.4	301.2			median	233.5	269.6	261.4		median	10.41	11.02	11.63			1.2	-45.1021	4.35328		-45.0867	5.41756
	-100	-67.8111	6.9878		-63.8962	6.79294		-64.3042	7.30935												95% CI lower	-59.69	-56.76	-58.1			95% CI lower	207.2	168.8	152.3			95% CI lower	199.7	213.2	222.8		95% CI lower	7.956	9.793	6.732			1.6	-45.0283	4.35113		-45.0219	5.44193
	-50	-63.5488	7.36351		-59.6868	6.6638		-54.459	19.7785												95% CI upper	-48.85	-51.41	-52.21			95% CI upper	392.8	397.1	379.8			95% CI upper	246.5	299.7	288		95% CI upper	16.53	17.75	17.75			2	-44.9552	4.35114		-44.9525	5.47309
	0	-56.2514	8.34157		-54.4233	4.87311		-50.3856	4.63149												MAD	5.1199	4.3195	3.83262			MAD	91.1094	113.223	93.689			MAD	29.4115	56.373	38.595		MAD	3.67265	3.6726	5.5087			2.4	-44.8846	4.35752		-44.896	5.4863
	50	-50.0843	8.22473		-45.0184	17.1812		-46.6539	6.29239																																			2.8	-44.804	4.36298		-44.8351	5.52176
																					Stat. test	Kruskal-Wallis test		P = 0.7976			Stat. test	Kruskal-Wallis test		P = 0.9878			Stat. test	Kruskal-Wallis test		P = 0.1914		Stat. test	Kruskal-Wallis test		P = 0.9343			3.2	-44.7199	4.37545		-44.7633	5.55772
stat. test	Two-way ANOVA repeated measures				Factors:	Group	P = 0.1465																																					3.6	-44.6395	4.38134		-44.6974	5.61268
						Current	P < 0.0001														Data	sham	6-OHDA	+chronic-LD			Data	sham	6-OHDA	chronic-LD			Data	sham	6-OHDA	chronic-LD		Data	sham	6-OHDA	chronic-LD			4	-44.5473	4.40836		-44.6175	5.64057
																						-65.7227	-56.4634	-43.3728				421.192	317.078	315.754				371.375	233.845	349.683			7.9564	4.8963	14.68			4.4	-44.4543	4.41605		-44.525	5.67082
						interaction	P = 0.6004															-70.1604	-52.6058	-43.0475				366.251	434.519	492.735				176.113	273.844	48.3261			12.853	9.7925	39.17			4.8	-44.3559	4.42364		-44.4496	5.72557
																						-53.973	-38.9352	-59.182				277.935	353.723	295.835				243.243	300.986	201.007			16.525	9.7925	34.274			5.2	-44.2653	4.44314		-44.3488	5.79686
Data	sham																					-56.5174	-50.3479	-55.2537				392.846	395.208	330.522				246.536	137.373	230.147			19.585	11.629	33.05			5.6	-44.1553	4.4622		-44.2512	5.86014
	current (pA)	1	2	3	4	5	6	7	8	9	10	11	12	13	14	15	16	17				-50.9845	-47.5427	-53.2664				392.046	434.201	545.587				237.323	363.096	408.165			9.7925	22.033	39.17			6	-44.0335	4.49003		-44.1468	5.94888
	-300	-86.8445	-81.7063	-66.7728	-77.7281	-78.7992	-77.8811	-77.2385	-79.1052	-75.8614	-64.5388	-86.6916	-82.5251	-81.8296	-82.027	-88.1263	-82.9355	-85.473				-56.756	-48.4647	-60.225				437.223	397.075	472.605				242.138	213.23	198.637			3.6722	7.3444	31.826			6.4	-43.9179	4.53923		-44.0465	6.05942
	-250	-83.5338	-78.585	-65.7017	-76.2593	-76.3817	-73.7805	-76.045	-76.4735	-72.9849	-60.8666	-83.4611	-79.5464	-79.4524	-79.173	-85.3176	-80.5729	-83.4025				-50.3905	-54.8047	-58.7426				446.455	168.762	224.456				260.173	360.478	284.853			5.5083	8.5685	14.077			6.8	-43.8044	4.56381		-43.9152	6.16067
	-200	-80.0423	-74.974	-65.4263	-74.5456	-75.7696	-69.6493	-73.5969	-73.1379	-69.4045	-57.1332	-80.5392	-76.5475	-76.5506	-77.1389	-82.2008	-77.6252	-80.731				-41.7766	-56.1104	-66.8499				542.29	143.127	222.777				219.72	198.637	261.42			52.023	10.405	18.361			7.2	-43.6722	4.58014		-43.7869	6.29335
	-150	-76.2513	-68.6088	-62.0295	-71.21	-73.5357	-65.7017	-71.6384	-71.1488	-64.8142	-53.8589	-77.0201	-73.7066	-73.7388	-74.5212	-79.9368	-74.478	-77.9627				-43.2043	-51.4114	-58.9897				343.392	196.533	354.858				186.203	244.059	257.334			58.755	7.3444	15.913			7.6	-43.5256	4.61149		-43.6298	6.44152
	-100	-74.2961	-64.3552	-57.8065	-68.0886	-72.3728	-61.7541	-68.3334	-66.0689	-60.7136	-50.2173	-73.7887	-70.3021	-70.5666	-71.5618	-76.9434	-70.6392	-74.9796				-72.3945	-48.2044	-47.4097				290.791	122.681	487.617				229.677	269.603	393.089			12.853	11.017	33.05			8	-43.3649	4.64334		-43.4576	6.65573
	-50	-72.5179	-57.3781	-53.461	-62.9169	-68.9149	-56.2458	-65.5181	-61.5705	-56.7048	-45.8412	-70.0382	-66.4446	-66.8623	-68.085	-71.1817	-66.0202	-70.6277				-56.3939	-55.7985	-44.2306				270.505	209.656	355.543				329.935	342.971	229.141			10.405	9.7925	17.749			8.4	-43.1858	4.68364		-43.2504	6.91625
	0	-69.353	-47.4937	-48.8708	-57.7759	-60.4076	-48.2894	-54.7463	-51.5637	-50.1867	-39.9351	-65.4077	-61.7082	-47.7744	-63.5248	-64.7115	-59.2584	-65.2659				-41.3568	-46.4967	-54.4634				333.339	241.699	379.778				397.759	299.741	222.825			58.755	11.629	17.137			8.8	-42.9643	4.79748		-43	7.24992
	50	-60.5167	-37.5482	-51.2577	-51.7168	-57.1638	-41.557	-53.8895	-43.3013	-40.1187	-33.6618	-55.5201	-54.8103	-50.784	-63.6104	-51.5226	-49.6397	-54.8149				-59.7647	-58.5369	-53.1275				298.48		136.108				251.645	390.526	418.127			10.405	6.7324	12.853			9.2	-42.699	4.95144		-42.7229	7.66019
																						-50.1817	-49.7	-54.5949				112.915		119.934				132.292	252.34	352.265			54.471	15.301	6.7324			9.6	-42.3471	5.18506		-42.4013	8.16667
	6-OHDA																					-52.5396	-60.1483	-49.8805				207.214		207.519				133.96	285.548	279.115			16.525	11.017	11.017			10	-41.837	5.63747		-42.0148	8.76702
	current (pA)	1	2	3	4	5	6	7	8	9	10	11	12	13	14	15	16	17	18			-48.8531	-59.7514	-63.198				115.967		133.362				239.676	209.736	398.862			6.1203	9.7925	4.8963			10.4	-39.9019	7.05955		-41.5117	9.4497
	-300	-78.5238	-81.89	-85.8376	-77.8505	-76.8407	-78.585	-79.6254	-76.3817	-88.8365	-68.6394	-70.5368	-88.0715	-77.0243	-70.1389	-72.0974	-66.7421	-75.127	-73.2603			-56.2269	-60.7804	-51.7169				120.239		102.234				199.725	258.924	298.51			7.3444	19.585	8.5685			10.8	-23.4102	20.2997		-39.4729	10.5005
	-250	-76.4735	-79.5948	-82.7162	-75.4942	-74.668	-76.4429	-76.1981	-74.0865	-84.5829	-68.6088	-70.4449	-84.5523	-70.6592	-67.6908	-65.1203	-63.5902	-73.4439	-70.4449			-44.5963	-60.7566	-39.7049				103.149		301.209				201.35	476.799	287.99			9.1805	23.869	11.629			11.2	4.00805	30.5839		-16.8429	19.9286
	-200	-73.9641	-77.2997	-80.5129	-73.4745	-71.7914	-74.1477	-71.3324	-71.7302	-80.4823	-66.5279	-68.1192	-81.8288	-63.2842	-65.7323	-57.1026	-62.0907	-68.211	-69.8941			-59.6927	-56.1765	-59.4609						152.283				173.768	270.997	266.074			7.3444	22.033	6.7324			11.6	17.5098	10.0306		13.7584	27.5817
	-150	-71.5466	-75.0658	-77.8811	-70.0165	-69.4657	-70.9346	-66.6197	-68.7619	-76.8101	-65.6099	-63.3454	-76.4429	-56.46	-63.6514	-52.8796	-58.7245	-65.9159	-67.7826				-50.6285	-41.5609										219.177	197.898	235.842			10.405	18.361	4.8963			12	11.8448	10.0796		12.7976	13.3189
	-100	-69.9859	-71.363	-73.3827	-67.2624	-66.7421	-67.0788	-61.4175	-65.5793	-71.6078	-62.3049	-60.2546	-69.3433	-51.6861	-59.2754	-49.3604	-55.2359	-63.3148	-64.9367				-61.7063	-50.1937											181.581	264.87				17.749	3.6722			12.4	-0.375116	12.3451		7.89682	9.30829
	-50	-66.4973	-67.6602	-68.6701	-62.2131	-62.5497	-62.7027	-56.7354	-60.2852	-66.6809	-57.6535	-58.9999	-63.223	-48.014	-54.2873	-43.8215	-52.9714	-59.918	-61.4787				-50.1987	-52.7794											276.652	270.572					9.7925			12.8	-13.3179	14.1123		-2.21394	13.1467
	0	-61.2645	-59.3672	-56.3376	-59.7344	-57.5005	-56.8578	-51.2271	-57.4393	-56.0316	-53.308	-56.9496	-53.3692	-42.8423	-52.237	-47.7691	-46.1779	-55.0523	-56.154				-56.6118	-58.4278											131.685	158.811					7.3444			13.2	-24.8043	14.0865		-13.7745	16.0343
	50	-56.001	-53.9201	-54.2873	-54.8993	-48.3812	-48.7484	-46.9735	-55.6338	19.4014	-52.39	-55.1441	-48.4424	-38.1908	-38.6193	-42.016	-38.4356	-47.1265	-50.5233				-40.869	-58.3056												137.177					6.1203			13.6	-33.0828	12.2673		-23.9833	16.8353
																							-71.6747	-58.4772												203.426					7.3444			14	-38.639	9.81948		-31.6326	15.5836
	+chronic-LD																						-60.4299	-58.1011												240.98					5.5083			14.4	-42.3471	7.77997		-37.0449	13.5034
	current (pA)	1	2	3	4	5	6	7	8	9	10	11	12	13	14	15	16	17	18				-52.0055	-44.8776												161.037					4.8963			14.8	-44.8465	6.53968		-40.8795	11.4871
	-300	-65.3957	-150.07	-73.1685	-74.7904	-73.9029	-75.0352	-77.2079	-75.7084	-73.2297	-68.3946	-83.0834	-74.7598	-81.0943	-84.9501	-73.9641	-69.5269	-85.8376	-66.2831				-53.5867	-52.2138																				15.2	-46.5794	5.89973		-43.6164	9.99096
	-250	-64.4776	-116.409	-69.3433	-72.9237	-75.739	-71.1488	-74.8822	-72.4953	-71.9444	-67.0788	-79.656	-73.2603	-82.7162	-81.0637	-70.8734	-66.0995	-81.8594	-64.753				-61.7917	-54.7933																				15.6	-47.8665	5.57877		-45.5859	8.99819
	-200	-63.8044	-105.025	-66.1607	-70.9652	-72.9237	-68.8231	-72.3728	-71.4548	-69.2209	-65.3957	-76.3205	-69.8023	-79.6866	-78.3708	-68.7007	-62.5803	-76.8713	-62.9475				-56.3266	-55.156																				16	-48.8766	5.38882		-47.0705	8.34136
	-150	-63.9268	-94.9262	-63.6514	-69.4351	-67.9662	-64.2328	-71.2712	-67.905	-67.293	-63.0088	-73.9029	-65.6099	-75.1882	-74.9128	-66.5279	-57.9289	-72.9849	-61.1421				-56.7637	-54.6449																				16.4	-49.6973	5.26184		-48.231	7.90005
	-100	-61.9377	-82.961	-61.6623	-65.3651	-61.8765	-59.2448	-66.987	-63.223	-64.141	-58.8469	-70.4449	-62.1519	-70.1083	-70.751	-62.9781	-52.2064	-71.1182	-51.4719				-56.3572	-55.5641																				16.8	-50.4027	5.16766		-49.1626	7.58081
	-50	-56.1846	-66.0995	-56.3376	-62.2131	-55.1747	-52.6654	-62.5191	-55.3583	-59.1835	-54.6851	-66.0689	-56.3376	-64.5694	-65.4875	-57.1026	-45.7494	-66.0689	21.5435				-60.161	-57.1092																				17.2	-50.9918	5.09156		-49.9499	7.35556
	0	-47.4631	-48.2282	-54.6545	-49.085	-46.2085	-44.403	-57.8677	-45.5352	-50.9823	-42.7505	-53.7671	-49.1156	-53.1856	-54.1343	-51.0741	-45.2292	-56.307	-56.9496					-52.9903																				17.6	-51.4964	5.02487		-50.6242	7.15751
	50	-46.4227	-36.8444	-43.4849	-51.2271	-39.3843	-36.7526	-52.5124	-47.0347	-49.3298	-51.6555	-52.1146	-42.5669	-59.5814	-53.1856	-45.627	-38.3744	-45.7494	-47.9222																									18	-51.9393	4.96043		-51.2011	6.97291
																																												18.4	-52.3279	4.93384		-51.7062	6.83635
																																												18.8	-52.6715	4.88886		-52.1464	6.72191
																																												19.2	-52.9868	4.85921		-52.5489	6.62487
																																												19.6	-53.2746	4.83655		-52.8868	6.538
																																												20	-53.5206	4.81346		-53.2047	6.47964
																																												20.4	-53.7494	4.80223		-53.4746	6.42371
																																												20.8	-53.9589	4.7841		-53.735	6.36954
																																												21.2	-54.1634	4.77111		-53.988	6.32733
																																												21.6	-54.3429	4.74979		-54.2006	6.30203
																																												22	-54.519	4.74139		-54.4084	6.2794
																																												22.4	-54.6771	4.73283		-54.5963	6.25211
																																												22.8	-54.8342	4.72506		-54.7667	6.23196
																																												23.2	-54.9829	4.7141		-54.9319	6.20655
																																												23.6	-55.1189	4.70604		-55.0638	6.19297
																																												24	-55.2568	4.69486		-55.2043	6.18864
																																												24.4	-55.3713	4.6977		-55.3412	6.18291
																																												24.8	-55.4936	4.68519		-55.464	6.16724
																																												25.2	-55.6016	4.69309		-55.5749	6.16147
																																												25.6	-55.7115	4.69153		-55.6888	6.14733
																																												26	-55.8113	4.68683		-55.7836	6.14285
																																												26.4	-55.913	4.68221		-55.8871	6.1417
																																												26.8	-56.0012	4.67822		-55.9791	6.13498
																																												27.2	-56.0849	4.67494		-56.0757	6.1334
																																												27.6	-56.1755	4.66837		-56.1487	6.14499
																																												28	-56.2482	4.66108		-56.2369	6.14595
																																												28.4	-56.32	4.65604		-56.3083	6.14051
																																												28.8	-56.3932	4.6516		-56.3785	6.1447
																																												29.2	-56.4615	4.64552		-56.44	6.14865
																																												29.6	-56.5141	4.64792		-56.5131	6.16021
																																												30	-56.5827	4.63025		-56.5669	6.14861
																																												30.4	-56.6325	4.6302		-56.632	6.15207
																																												30.8	-56.6882	4.62329		-56.6777	6.15415
																																												31.2	-56.7429	4.62655		-56.7354	6.16116
																																												31.6	-56.7963	4.62807		-56.7979	6.1507
																																												32	-56.841	4.62002		-56.8268	6.15619
																																												32.4	-56.871	4.62051		-56.884	6.18045
																																												32.8	-56.9214	4.61837		-56.9102	6.16635
																																												33.2	-56.9616	4.61027		-56.946	6.17864
																																												33.6	-56.9995	4.60827		-56.9896	6.17109
																																												34	-57.0276	4.60116		-57.0253	6.17059
																																												34.4	-57.0674	4.59862		-57.0512	6.16142
																																												34.8	-57.0931	4.58673		-57.0982	6.17201
																																												35.2	-57.1264	4.58495		-57.1335	6.18618
																																												35.6	-57.1486	4.58128		-57.1531	6.1802
																																												36	-57.1786	4.57888		-57.1757	6.19457
																																												36.4	-57.2061	4.56681		-57.2139	6.18893
																																												36.8	-57.2271	4.56635		-57.2401	6.17765
																																												37.2	-57.2489	4.5554		-57.265	6.18561
																																												37.6	-57.2734	4.54867		-57.2905	6.17418
																																												38	-57.2952	4.55565		-57.322	6.18076
																																												38.4	-57.3164	4.53728		-57.3359	6.18262
																																												38.8	-57.3263	4.53102		-57.3487	6.19954
																																												39.2	-57.3534	4.52013		-57.366	6.19122
																																												39.6	-57.368	4.50891		-57.3926	6.21003
																																												40	-57.3802	4.49698		-57.3919	6.20308
																																												40.4	-57.396	4.49261		-57.4095	6.19464
																																												40.8	-57.4073	4.48389		-57.4306	6.19455
																																												41.2	-57.4168	4.47673		-57.4328	6.21343
																																												41.6	-57.4271	4.46616		-57.4576	6.20847
																																												42	-57.4397	4.46205		-57.4709	6.2086
																																												42.4	-57.4508	4.45244		-57.4876	6.21342
																																												42.8	-57.4549	4.44429		-57.4955	6.20101
																																												43.2	-57.4609	4.44772		-57.4911	6.20905
																																												43.6	-57.4661	4.44332		-57.5081	6.20871
																																												44	-57.4812	4.43638		-57.5024	6.21622
																																												44.4	-57.4856	4.41976		-57.5187	6.20931
																																												44.8	-57.4859	4.41873		-57.5155	6.20708
																																												45.2	-57.4806	4.41266		-57.5113	6.21661
																																												45.6	-57.4871	4.40289		-57.5192	6.20773
																																												46	-57.4879	4.39084		-57.5162	6.20521
																																												46.4	-57.4876	4.3934		-57.526	6.21508
																																												46.8	-57.4843	4.38031		-57.5321	6.19982
																																												47.2	-57.4823	4.37103		-57.5333	6.1972
																																												sham
																																											Data	time (ms)	1	2	3	4	5
																																												0	-51.9565	-51.6556	-48.9075	-47.6467	-45.4067
																																												0.4	-51.8723	-51.6005	-48.8708	-47.662	-45.3026
																																												0.8	-51.8392	-51.5331	-48.779	-47.6008	-45.2659
																																												1.2	-51.7525	-51.4413	-48.6138	-47.5396	-45.1252
																																												1.6	-51.6658	-51.3556	-48.5525	-47.532	-45.0517
																																												2	-51.6173	-51.2149	-48.4852	-47.5243	-44.9966
																																												2.4	-51.5688	-51.0925	-48.4179	-47.4784	-44.9048
																																												2.8	-51.4923	-50.9945	-48.3322	-47.3637	-44.8008
																																												3.2	-51.4286	-50.9089	-48.2098	-47.3254	-44.7457
																																												3.6	-51.3827	-50.8109	-48.1302	-47.2566	-44.5804
																																												4	-51.3062	-50.6885	-48.069	-47.226	-44.5131
																																												4.4	-51.2195	-50.56	-48.0078	-47.1648	-44.4458
																																												4.8	-51.1353	-50.4009	-47.8732	-47.1265	-44.3295
																																												5.2	-51.0435	-50.2968	-47.8181	-47.0959	-44.2377
																																												5.6	-50.967	-50.1683	-47.763	-47.0347	-44.0969
																																												6	-50.8905	-49.9786	-47.6529	-46.8894	-44.0663
																																												6.4	-50.8166	-49.8684	-47.5611	-46.8205	-43.9501
																																												6.8	-50.6992	-49.7276	-47.3958	-46.8052	-43.8705
																																												7.2	-50.6355	-49.5869	-47.2306	-46.6904	-43.742
																																												7.6	-50.508	-49.391	-47.0653	-46.6139	-43.6012
																																												8	-50.3805	-49.134	-46.949	-46.5604	-43.4482
																																												8.4	-50.2147	-48.9381	-46.7715	-46.4762	-43.2768
																																												8.8	-50.0286	-48.6811	-46.6002	-46.3615	-43.0932
																																												9.2	-49.822	-48.3995	-46.3615	-46.1549	-42.879
																																												9.6	-49.5746	-48.0017	-46.0677	-45.9024	-42.5791
																																												10	-49.2278	-47.5611	-45.6515	-45.4511	-42.1874
																																												10.4	-43.3931	-44.9783	-44.9844	-39.4072	-40.8532
																																												10.8	-7.15058	-4.24139	-17.6877	-19.585	3.65996
																																												11.2	13.0898	19.077	34.5737	23.701	36.2996
																																												11.6	7.04092	11.2614	17.4613	16.762	20.0441
																																												12	-3.36873	-0.330498	-0.807883	-1.27762	7.66265
																																												12.4	-15.0866	-12.8098	-18.3732	-16.4407	-3.01732
																																												12.8	-27.2788	-25.8033	-35.4	-30.1349	-15.2825
																																												13.2	-37.1606	-36.2323	-45.6393	-39.3919	-28.5391
																																												13.6	-43.7348	-42.7627	-50.2968	-44.1505	-37.8297
																																												14	-47.8839	-46.5757	-52.6348	-46.4303	-42.8178
																																												14.4	-50.5641	-48.981	-54.1771	-47.861	-45.5169
																																												14.8	-52.4129	-50.6641	-55.3828	-49.0085	-47.2856
																																												15.2	-53.79	-52.0166	-56.3315	-50.0107	-48.7484
																																												15.6	-54.805	-53.1428	-57.2373	-51.0053	-49.8807
																																												16	-55.5904	-54.1404	-57.9105	-51.8774	-50.8477
																																												16.4	-56.2203	-54.9605	-58.4797	-52.6807	-51.6066
																																												16.8	-56.7584	-55.7256	-59.0611	-53.3845	-52.3043
																																												17.2	-57.1919	-56.3682	-59.514	-54.0195	-52.898
																																												17.6	-57.5413	-56.9435	-59.9119	-54.5627	-53.3631
																																												18	-57.8473	-57.4699	-60.224	-55.06	-53.7977
																																												18.4	-58.138	-57.9228	-60.579	-55.519	-54.1526
																																												18.8	-58.3777	-58.3389	-60.8728	-55.9168	-54.4709
																																												19.2	-58.6072	-58.7551	-61.1359	-56.3299	-54.783
																																												19.6	-58.801	-59.1162	-61.3746	-56.6819	-55.0646
																																												20	-58.9617	-59.4651	-61.5643	-57.0414	-55.2727
																																												20.4	-59.1147	-59.716	-61.7969	-57.3398	-55.4991
																																												20.8	-59.2448	-60.0159	-61.9805	-57.6229	-55.6827
																																												21.2	-59.3927	-60.273	-62.1519	-57.9059	-55.9398
																																												21.6	-59.5023	-60.4994	-62.2988	-58.1431	-56.1112
																																												22	-59.6069	-60.7197	-62.4947	-58.4185	-56.2274
																																												22.4	-59.7267	-60.9034	-62.6232	-58.648	-56.4233
																																												22.8	-59.8211	-61.1359	-62.7456	-58.824	-56.5518
																																												23.2	-59.9129	-61.3134	-62.8496	-59.0458	-56.6681
																																												23.6	-59.9664	-61.5031	-62.9965	-59.2448	-56.8211
																																												24	-60.0506	-61.7296	-63.0944	-59.436	-56.919
																																												24.4	-60.1195	-61.8704	-63.174	-59.6349	-57.0047
																																												24.8	-60.1934	-62.0417	-63.2781	-59.7573	-57.121
																																												25.2	-60.2393	-62.2498	-63.3821	-59.9409	-57.17
																																												25.6	-60.2852	-62.4151	-63.4494	-60.1016	-57.2924
																																												26	-60.3362	-62.5681	-63.5351	-60.2699	-57.3719
																																												26.4	-60.4153	-62.666	-63.6147	-60.4076	-57.4515
																																												26.8	-60.4739	-62.7701	-63.6575	-60.553	-57.5188
																																												27.2	-60.5275	-62.9108	-63.7371	-60.6371	-57.5555
																																												27.6	-60.5581	-63.0271	-63.7983	-60.7672	-57.6474
																																												28	-60.6167	-63.1189	-63.8595	-60.8666	-57.7147
																																												28.4	-60.6448	-63.2291	-63.8778	-60.9814	-57.7636
																																												28.8	-60.683	-63.327	-63.9146	-61.1038	-57.782
																																												29.2	-60.7366	-63.4372	-63.9819	-61.165	-57.8371
																																												29.6	-60.7468	-63.5229	-64.0492	-61.2415	-57.8432
																																												30	-60.757	-63.5963	-64.0676	-61.3563	-57.9472
																																												30.4	-60.7978	-63.7065	-64.1165	-61.4098	-57.9595
																																												30.8	-60.8105	-63.7615	-64.1471	-61.494	-57.9962
																																												31.2	-60.8182	-63.9084	-64.1961	-61.5552	-58.0819
																																												31.6	-60.8309	-63.988	-64.2145	-61.6852	-58.0941
																																												32	-60.8539	-64.0676	-64.2083	-61.7235	-58.1492
																																												32.4	-60.8488	-64.1226	-64.2634	-61.8229	-58.1553
																																												32.8	-60.8717	-64.1839	-64.2756	-61.8688	-58.137
																																												33.2	-60.8921	-64.3124	-64.2818	-61.9224	-58.2104
																																												33.6	-60.887	-64.4164	-64.2879	-62.0065	-58.2655
																																												34	-60.887	-64.4715	-64.294	-62.0677	-58.2716
																																												34.4	-60.8819	-64.5572	-64.3063	-62.1366	-58.2594
																																												34.8	-60.8794	-64.545	-64.3124	-62.1596	-58.3328
																																												35.2	-60.8743	-64.6674	-64.3063	-62.1825	-58.3022
																																												35.6	-60.8972	-64.7224	-64.3613	-62.2361	-58.3206
																																												36	-60.8743	-64.7775	-64.3736	-62.2896	-58.3328
																																												36.4	-60.8615	-64.8204	-64.3736	-62.3126	-58.3328
																																												36.8	-60.8641	-64.8632	-64.3981	-62.3738	-58.3451
																																												37.2	-60.8819	-64.906	-64.3981	-62.3967	-58.3512
																																												37.6	-60.9049	-64.9734	-64.3369	-62.4732	-58.3695
																																												38	-60.8794	-65.0346	-64.3981	-62.5038	-58.3512
																																												38.4	-60.8921	-65.0529	-64.3919	-62.5115	-58.3695
																																												38.8	-60.8794	-65.0958	-64.3491	-62.5421	-58.3267
																																												39.2	-60.8615	-65.1325	-64.3491	-62.565	-58.3512
																																												39.6	-60.8845	-65.1692	-64.3491	-62.5497	-58.3328
																																												40	-60.8615	-65.1876	-64.3185	-62.6109	-58.3083
																																												40.4	-60.836	-65.2427	-64.3369	-62.5956	-58.3695
																																												40.8	-60.8258	-65.3039	-64.3124	-62.6415	-58.3328
																																												41.2	-60.8309	-65.2855	-64.3124	-62.6492	-58.3083
																																												41.6	-60.8003	-65.31	-64.3246	-62.6186	-58.3145
																																												42	-60.8054	-65.359	-64.3001	-62.6186	-58.2961
																																												42.4	-60.7621	-65.3773	-64.2757	-62.6492	-58.29
																																												42.8	-60.7697	-65.3406	-64.2573	-62.6721	-58.2716
																																												43.2	-60.7468	-65.4141	-64.2634	-62.6951	-58.29
																																												43.6	-60.7544	-65.4202	-64.2695	-62.718	-58.29
																																												44	-60.7723	-65.4569	-64.2757	-62.6951	-58.3022
																																												44.4	-60.7264	-65.4814	-64.2389	-62.7104	-58.2716
																																												44.8	-60.7366	-65.5181	-64.2389	-62.7027	-58.241
																																												45.2	-60.7162	-65.5181	-64.2144	-62.7027	-58.2227
																																												45.6	-60.6983	-65.5487	-64.2022	-62.6874	-58.2349
																																												46	-60.6881	-65.5609	-64.2022	-62.6721	-58.1676
																																												46.4	-60.683	-65.6099	-64.19	-62.6874	-58.1921
																																												46.8	-60.6703	-65.5854	-64.19	-62.6798	-58.1615
																																												47.2	-60.6703	-65.5977	-64.1594	-62.6798	-58.1186
																																													6-OHDA
																																												time (ms)	1	2	3	4	5
																																												0	-44.8543	-47.7018	-49.8745	-41.7177	-51.778
																																												0.4	-44.7625	-47.6039	-49.795	-41.6488	-51.7091
																																												0.8	-44.6784	-47.5182	-49.7032	-41.6794	-51.6708
																																												1.2	-44.5789	-47.4325	-49.6542	-41.6335	-51.5867
																																												1.6	-44.5866	-47.3346	-49.5624	-41.5876	-51.5637
																																												2	-44.4489	-47.2918	-49.4584	-41.5341	-51.4413
																																												2.4	-44.4106	-47.2061	-49.4033	-41.4576	-51.4031
																																												2.8	-44.3188	-47.1143	-49.3421	-41.427	-51.3801
																																												3.2	-44.2729	-47.0531	-49.2441	-41.3657	-51.3113
																																												3.6	-44.1887	-46.9674	-49.2135	-41.3351	-51.273
																																												4	-44.074	-46.8327	-49.1462	-41.2357	-51.1353
																																												4.4	-43.921	-46.7715	-49.0422	-41.1745	-51.0665
																																												4.8	-43.898	-46.6797	-48.9626	-41.1439	-50.9594
																																												5.2	-43.7374	-46.539	-48.8463	-41.0827	-50.837
																																												5.6	-43.6991	-46.441	-48.73	-41.0215	-50.7069
																																												6	-43.5844	-46.3125	-48.5954	-40.922	-50.5998
																																												6.4	-43.462	-46.2268	-48.5954	-40.8914	-50.5539
																																												6.8	-43.2936	-46.1289	-48.5525	-40.7843	-50.3932
																																												7.2	-43.2095	-45.933	-48.4546	-40.7078	-50.2479
																																												7.6	-43.0106	-45.8106	-48.2955	-40.5166	-50.0719
																																												8	-42.7964	-45.5903	-48.1547	-40.3635	-49.9801
																																												8.4	-42.5669	-45.3945	-48.0201	-40.2335	-49.7659
																																												8.8	-42.2991	-45.1374	-47.861	-40.0116	-49.5823
																																												9.2	-42.0466	-44.9293	-47.6467	-39.8663	-49.3757
																																												9.6	-41.7406	-44.6172	-47.4142	-39.698	-49.1156
																																												10	-41.5494	-44.2928	-47.151	-39.545	-48.8096
																																												10.4	-41.098	-43.8399	-46.8205	-39.3384	-48.4041
																																												10.8	-40.4324	-43.1361	-46.2941	-39.04	-47.6161
																																												11.2	-14.7959	-20.5704	-25.4912	-35.758	-18.4834
																																												11.6	23.066	21.77	26.5255	3.32028	21.819
																																												12	18.3227	11.4634	16.2005	3.97821	16.2954
																																												12.4	4.27658	-4.49232	1.42604	-10.9401	3.7946
																																												12.8	-11.6133	-18.7527	-12.3937	-23.5173	-9.52476
																																												13.2	-26.8988	-30.7057	-27.9209	-33.1951	-24.7338
																																												13.6	-36.8061	-38.3867	-40.1738	-38.1602	-37.7318
																																												14	-41.9625	-42.4934	-46.7164	-40.2335	-45.6194
																																												14.4	-44.862	-44.8069	-50.0581	-41.2204	-49.9801
																																												14.8	-46.7134	-46.2635	-52.1085	-41.7789	-52.7037
																																												15.2	-47.9604	-47.2489	-53.5345	-42.2685	-54.5704
																																												15.6	-48.9397	-48.0262	-54.5933	-42.6893	-56.0163
																																												16	-49.72	-48.6627	-55.3645	-43.0871	-57.1638
																																												16.4	-50.3014	-49.134	-56.0622	-43.4467	-58.1431
																																												16.8	-50.7452	-49.5134	-56.6191	-43.7986	-58.8852
																																												17.2	-51.12	-49.9174	-57.0414	-44.1352	-59.6196
																																												17.6	-51.4796	-50.2173	-57.4025	-44.38	-60.2164
																																												18	-51.8086	-50.4498	-57.7208	-44.6554	-60.6218
																																												18.4	-52.0687	-50.6824	-57.9778	-44.862	-61.0808
																																												18.8	-52.2905	-50.8966	-58.2533	-45.0838	-61.4863
																																												19.2	-52.4894	-51.1047	-58.4675	-45.2216	-61.8688
																																												19.6	-52.6731	-51.2455	-58.6266	-45.3899	-62.2055
																																												20	-52.8949	-51.4046	-58.8408	-45.5199	-62.4962
																																												20.4	-53.025	-51.5331	-58.9755	-45.627	-62.7257
																																												20.8	-53.2009	-51.6739	-59.0979	-45.7724	-62.9935
																																												21.2	-53.3233	-51.7841	-59.2876	-45.9636	-63.2077
																																												21.6	-53.3845	-51.8636	-59.3916	-46.0478	-63.3913
																																												22	-53.5299	-51.9922	-59.5446	-46.1702	-63.5825
																																												22.4	-53.6523	-52.0779	-59.6365	-46.2926	-63.7049
																																												22.8	-53.7671	-52.1758	-59.7466	-46.3538	-63.8579
																																												23.2	-53.8665	-52.2615	-59.8201	-46.4533	-64.0416
																																												23.6	-53.9277	-52.3227	-59.9425	-46.5527	-64.164
																																												24	-54.0272	-52.439	-60.0404	-46.5986	-64.294
																																												24.4	-54.1343	-52.5063	-60.0955	-46.6904	-64.4929
																																												24.8	-54.2337	-52.5797	-60.1934	-46.7669	-64.6077
																																												25.2	-54.3332	-52.6409	-60.2056	-46.7975	-64.6918
																																												25.6	-54.3638	-52.6409	-60.2668	-46.874	-64.7913
																																												26	-54.4556	-52.7633	-60.3281	-46.9046	-64.9596
																																												26.4	-54.5091	-52.8062	-60.426	-46.9811	-65.0514
																																												26.8	-54.5857	-52.849	-60.4443	-47.0347	-65.082
																																												27.2	-54.6851	-52.9714	-60.53	-47.1189	-65.235
																																												27.6	-54.7081	-52.9775	-60.5484	-47.1112	-65.2656
																																												28	-54.7922	-53.0265	-60.6035	-47.203	-65.4033
																																												28.4	-54.8458	-53.0693	-60.6402	-47.2566	-65.4798
																																												28.8	-54.9146	-53.0999	-60.732	-47.2566	-65.5487
																																												29.2	-54.9452	-53.0816	-60.7381	-47.3254	-65.6481
																																												29.6	-55.0141	-53.0999	-60.7687	-47.3331	-65.694
																																												30	-55.06	-53.1489	-60.8116	-47.3637	-65.7629
																																												30.4	-55.0676	-53.1979	-60.8605	-47.4478	-65.8547
																																												30.8	-55.1518	-53.2468	-60.8728	-47.4249	-65.9236
																																												31.2	-55.1671	-53.2652	-60.9217	-47.4784	-65.9389
																																												31.6	-55.2436	-53.3019	-60.934	-47.509	-65.9924
																																												32	-55.2818	-53.3019	-60.9584	-47.4937	-66.046
																																												32.4	-55.3124	-53.3325	-60.989	-47.5014	-66.1378
																																												32.8	-55.3201	-53.3386	-61.0135	-47.4784	-66.1684
																																												33.2	-55.3354	-53.3754	-60.9952	-47.5396	-66.1913
																																												33.6	-55.389	-53.3754	-61.0196	-47.5626	-66.2143
																																												34	-55.4119	-53.4243	-61.1176	-47.5702	-66.2066
																																												34.4	-55.4654	-53.4182	-61.0931	-47.5702	-66.2372
																																												34.8	-55.5037	-53.4427	-61.1115	-47.5779	-66.3061
																																												35.2	-55.5496	-53.4427	-61.1543	-47.5855	-66.3367
																																												35.6	-55.6261	-53.4549	-61.1604	-47.5626	-66.3443
																																												36	-55.5955	-53.4794	-61.1665	-47.5855	-66.3902
																																												36.4	-55.6261	-53.4855	-61.1788	-47.6008	-66.4285
																																												36.8	-55.6567	-53.51	-61.1604	-47.662	-66.4361
																																												37.2	-55.672	-53.4978	-61.1849	-47.6161	-66.4744
																																												37.6	-55.7179	-53.5284	-61.1849	-47.6085	-66.4514
																																												38	-55.7715	-53.5406	-61.1971	-47.6773	-66.5126
																																												38.4	-55.7638	-53.5957	-61.2216	-47.6773	-66.4897
																																												38.8	-55.7638	-53.5896	-61.24	-47.6467	-66.5203
																																												39.2	-55.8097	-53.5712	-61.2094	-47.685	-66.505
																																												39.6	-55.8097	-53.6324	-61.2277	-47.6697	-66.5432
																																												40	-55.8556	-53.6263	-61.2339	-47.6391	-66.5203
																																												40.4	-55.8556	-53.6141	-61.1849	-47.6926	-66.5738
																																												40.8	-55.8786	-53.5957	-61.2033	-47.7156	-66.5279
																																												41.2	-55.848	-53.6018	-61.2033	-47.7156	-66.5815
																																												41.6	-55.8709	-53.5835	-61.2094	-47.7538	-66.6274
																																												42	-55.8709	-53.6018	-61.2583	-47.7385	-66.6197
																																												42.4	-55.9015	-53.6814	-61.2094	-47.7309	-66.6503
																																												42.8	-55.9015	-53.6569	-61.2216	-47.7232	-66.635
																																												43.2	-55.9245	-53.5896	-61.191	-47.7615	-66.6121
																																												43.6	-55.9704	-53.6569	-61.2339	-47.7156	-66.658
																																												44	-55.9627	-53.6569	-61.2461	-47.6544	-66.6656
																																												44.4	-55.9704	-53.6385	-61.2216	-47.662	-66.6656
																																												44.8	-55.9245	-53.6508	-61.2277	-47.685	-66.7039
																																												45.2	-55.9551	-53.6263	-61.2522	-47.6467	-66.6274
																																												45.6	-55.9474	-53.6079	-61.2094	-47.6773	-66.658
																																												46	-55.9168	-53.5957	-61.2094	-47.6697	-66.658
																																												46.4	-55.9092	-53.5712	-61.2277	-47.6391	-66.658
																																												46.8	-55.978	-53.5773	-61.2094	-47.685	-66.6197
																																												47.2	-55.9092	-53.559	-61.2094	-47.662	-66.6274
																																													+chronic-LD
																																												time (ms)	1	2	3	4	5
																																												0	-43.6948	-36.1813	-35.4979	-41.8998	-38.5213
																																												0.4	-43.6371	-36.164	-35.4907	-41.8851	-38.492
																																												0.8	-43.5527	-36.1179	-35.4066	-41.8942	-38.4381
																																												1.2	-43.4696	-36.0583	-35.3178	-41.8691	-38.372
																																												1.6	-43.3962	-36.002	-35.2393	-41.8098	-38.2839
																																												2	-43.3066	-35.9461	-35.1628	-41.7284	-38.1988
																																												2.4	-43.2353	-35.8873	-35.0547	-41.6335	-38.1302
																																												2.8	-43.1557	-35.8072	-34.9455	-41.5282	-38.0758
																																												3.2	-43.0766	-35.7496	-34.8425	-41.4077	-37.9852
																																												3.6	-42.945	-35.6688	-34.7538	-41.311	-37.9111
																																												4	-42.8147	-35.5946	-34.6584	-41.2045	-37.815
																																												4.4	-42.6731	-35.5189	-34.5538	-41.1176	-37.7398
																																												4.8	-42.5865	-35.4265	-34.4391	-41.0815	-37.6939
																																												5.2	-42.4856	-35.3029	-34.3238	-41.0184	-37.6021
																																												5.6	-42.3448	-35.2117	-34.2101	-40.9591	-37.5127
																																												6	-42.2136	-35.1243	-34.0887	-40.8721	-37.4178
																																												6.4	-42.072	-34.9979	-33.9698	-40.7901	-37.2942
																																												6.8	-41.9378	-34.8673	-33.8694	-40.7142	-37.1626
																																												7.2	-41.7913	-34.739	-33.7623	-40.6457	-37.0176
																																												7.6	-41.6108	-34.6096	-33.6373	-40.5606	-36.8431
																																												8	-41.4097	-34.4674	-33.4761	-40.4853	-36.6479
																																												8.4	-41.178	-34.3085	-33.3303	-40.3232	-36.4263
																																												8.8	-40.934	-34.1039	-33.1528	-40.1242	-36.173
																																												9.2	-40.6556	-33.8713	-32.8881	-39.937	-35.8884
																																												9.6	-40.357	-33.5728	-32.5734	-39.7295	-35.5254
																																												10	-39.9224	-33.0377	-32.0654	-39.4106	-35.067
																																												10.4	-38.7806	-28.8792	-29.8463	-38.4815	-34.2842
																																												10.8	-20.4804	-7.74486	-8.50521	-23.0412	-21.5784
																																												11.2	19.2073	15.583	21.3064	15.1184	26.4533
																																												11.6	26.5744	18.4473	25.9216	21.9053	35.4446
																																												12	18.3863	14.0251	20.9336	13.8546	22.8906
																																												12.4	8.53436	8.647	14.6036	4.82037	10.7522
																																												12.8	-0.907994	3.43146	8.12014	-4.04554	0.118734
																																												13.2	-10.1759	-1.54416	1.13226	-13.185	-10.1854
																																												13.6	-18.855	-6.21458	-6.3886	-22.0105	-19.3892
																																												14	-26.063	-10.5002	-13.6432	-29.0728	-26.3272
																																												14.4	-31.3273	-14.3591	-19.7921	-33.8619	-30.7142
																																												14.8	-34.9322	-17.6606	-24.3676	-36.859	-33.2695
																																												15.2	-37.4127	-20.4168	-27.5175	-38.7863	-34.884
																																												15.6	-39.2225	-22.7103	-29.6785	-40.0759	-35.9459
																																												16	-40.6958	-24.6353	-31.1759	-41.005	-36.7501
																																												16.4	-41.9277	-26.2452	-32.2572	-41.7376	-37.4276
																																												16.8	-43.0106	-27.6304	-33.0982	-42.3618	-38.0237
																																												17.2	-43.9693	-28.8522	-33.7755	-42.8674	-38.5611
																																												17.6	-44.8371	-29.9219	-34.2978	-43.2731	-39.0403
																																												18	-45.627	-30.8632	-34.7349	-43.6122	-39.4957
																																												18.4	-46.3261	-31.6906	-35.1276	-43.947	-39.9278
																																												18.8	-46.9932	-32.4689	-35.4586	-44.2487	-40.3421
																																												19.2	-47.5877	-33.1938	-35.731	-44.5039	-40.7369
																																												19.6	-48.1163	-33.847	-35.9799	-44.7341	-41.0864
																																												20	-48.6098	-34.4452	-36.1732	-44.9183	-41.3942
																																												20.4	-49.0671	-34.987	-36.343	-45.0964	-41.6788
																																												20.8	-49.4924	-35.5034	-36.5108	-45.2782	-41.9811
																																												21.2	-49.8522	-35.97	-36.6505	-45.4061	-42.2455
																																												21.6	-50.1779	-36.3847	-36.7689	-45.4893	-42.5142
																																												22	-50.4892	-36.7644	-36.8699	-45.5726	-42.7174
																																												22.4	-50.7943	-37.1355	-36.9734	-45.6839	-42.9218
																																												22.8	-51.0566	-37.4729	-37.0713	-45.7684	-43.1385
																																												23.2	-51.3019	-37.7742	-37.1351	-45.8486	-43.3246
																																												23.6	-51.534	-38.0525	-37.2203	-45.8835	-43.4886
																																												24	-51.7801	-38.3187	-37.3075	-45.8816	-43.6196
																																												24.4	-51.9834	-38.5719	-37.3743	-45.8725	-43.7781
																																												24.8	-52.1854	-38.8139	-37.437	-45.8822	-43.9354
																																												25.2	-52.3708	-39.0399	-37.4824	-45.8755	-44.0559
																																												25.6	-52.5452	-39.256	-37.5059	-45.8645	-44.1869
																																												26	-52.6986	-39.4492	-37.5569	-45.8743	-44.2916
																																												26.4	-52.8626	-39.6181	-37.6257	-45.9006	-44.4152
																																												26.8	-53.0164	-39.775	-37.6879	-45.8994	-44.5364
																																												27.2	-53.1668	-39.9278	-37.7155	-45.9214	-44.6368
																																												27.6	-53.2844	-40.0634	-37.7563	-45.9355	-44.7439
																																												28	-53.4156	-40.1956	-37.7792	-45.9465	-44.84
																																												28.4	-53.5432	-40.317	-37.8017	-45.9698	-44.9342
																																												28.8	-53.6608	-40.4148	-37.8496	-45.9838	-45.0401
																																												29.2	-53.7727	-40.5235	-37.8833	-46.0016	-45.1325
																																												29.6	-53.8484	-40.6312	-37.9113	-45.9655	-45.2292
																																												30	-53.9415	-40.7108	-37.971	-45.952	-45.3222
																																												30.4	-54.0298	-40.8069	-37.9776	-45.9471	-45.3785
																																												30.8	-54.1041	-40.8805	-37.9975	-45.9477	-45.452
																																												31.2	-54.2047	-40.9533	-38.0394	-45.9379	-45.5193
																																												31.6	-54.289	-41.0266	-38.0587	-45.9453	-45.586
																																												32	-54.3835	-41.0992	-38.0985	-45.911	-45.6387
																																												32.4	-54.4521	-41.1492	-38.1082	-45.9141	-45.6509
																																												32.8	-54.5251	-41.219	-38.1184	-45.9116	-45.7011
																																												33.2	-54.5623	-41.2855	-38.1189	-45.8853	-45.728
																																												33.6	-54.6235	-41.3538	-38.148	-45.8676	-45.7513
																																												34	-54.6781	-41.3969	-38.1623	-45.8682	-45.8149
																																												34.4	-54.7494	-41.4346	-38.2056	-45.8737	-45.848
																																												34.8	-54.8115	-41.4762	-38.2337	-45.8725	-45.8645
																																												35.2	-54.8591	-41.5195	-38.2597	-45.8749	-45.9079
																																												35.6	-54.9264	-41.5427	-38.2857	-45.848	-45.9508
																																												36	-54.9745	-41.5901	-38.2867	-45.8198	-46.0102
																																												36.4	-55.0283	-41.6372	-38.3097	-45.848	-46.0383
																																												36.8	-55.0834	-41.6804	-38.3239	-45.8492	-46.0726
																																												37.2	-55.1271	-41.7188	-38.3418	-45.8461	-46.1209
																																												37.6	-55.1651	-41.7618	-38.3474	-45.7623	-46.1662
																																												38	-55.2049	-41.788	-38.377	-45.7286	-46.1968
																																												38.4	-55.2333	-41.8306	-38.3933	-45.6913	-46.2201
																																												38.8	-55.2534	-41.8732	-38.4178	-45.6656	-46.2544
																																												39.2	-55.2788	-41.8955	-38.4254	-45.6258	-46.2758
																																												39.6	-55.3085	-41.9193	-38.4372	-45.6081	-46.3027
																																												40	-55.3584	-41.9344	-38.4698	-45.5897	-46.3272
																																												40.4	-55.3872	-41.941	-38.4815	-45.5811	-46.37
																																												40.8	-55.4139	-41.961	-38.5076	-45.567	-46.3982
																																												41.2	-55.4261	-41.9618	-38.531	-45.5842	-46.4049
																																												41.6	-55.4593	-41.9895	-38.554	-45.5836	-46.4196
																																												42	-55.4886	-41.9938	-38.5917	-45.5646	-46.4692
																																												42.4	-55.4934	-42.0146	-38.6101	-45.553	-46.4833
																																												42.8	-55.5044	-42.024	-38.6228	-45.5034	-46.4906
																																												43.2	-55.5205	-42.0146	-38.6284	-45.4691	-46.5175
																																												43.6	-55.545	-42.0373	-38.656	-45.4385	-46.5163
																																												44	-55.5638	-42.0332	-38.6667	-45.3981	-46.5206
																																												44.4	-55.5922	-42.0532	-38.6759	-45.3412	-46.5133
																																												44.8	-55.6193	-42.0876	-38.6764	-45.2971	-46.4882
																																												45.2	-55.6381	-42.095	-38.7049	-45.2708	-46.4894
																																												45.6	-55.6683	-42.1125	-38.7437	-45.2366	-46.4796
																																												46	-55.6858	-42.1213	-38.7508	-45.2078	-46.4814
																																												46.4	-55.7068	-42.1156	-38.7575	-45.1698	-46.4863
																																												46.8	-55.7111	-42.125	-38.7738	-45.1429	-46.479
																																												47.2	-55.7008	-42.1301	-38.7802	-45.1313	-46.4771
[truncated: 23 more columns]
