# Supplementary material for: Alterations in the intrinsic properties of striatal cholinergic interneurons after dopamine lesion and chronic L-DOPA
Source: eLife. 2020 Jul 20;9:e56920. doi: 10.7554/eLife.56920 (PMC7380940; doi:10.7554/eLife.56920)
Supplement: Figure 2—source data 1. [file elife-56920-fig2-data1.xlsx]

## Sheet: Figure 2
	Figure 2b - Sholl plot																															Figure 2c - total neurite length (μm)					Figure 2d - total intersecitons					Figure 2e - ending radius (μM)					Figure 2f - # of primary branches
	intersections with Sholl radii vs. distance from soma																																				Total intersections with Sholl radii					Maximum Sholl radius intersected
group	sham	6-OHDA	+chronic-LD																												group	sham	6-OHDA	+chronic-LD		group	sham	6-OHDA	+chronic-LD		group	sham	6-OHDA	+chronic-LD		group	sham	6-OHDA	+chronic-LD
N (cells)	13	28	19																												N (cells)	13	28	19		N (cells)	13	28	19		N (cells)	13	28	19		N (cells)	13	28	19
#mice	7	14	10								Dunnet's multiple comparison test																				#mice	7	14	10		#mice	7	14	10		#mice	7	14	10		#mice	7	14	10
											P values
mean data		sham			6-OHDA			+chronic-LD			sham vs.	sham vs.																			mean	3629	6450	7515		mean	216.5	372.2	420.1		mean	227.7	284.3	288.9		mean	5.308	6.786	6.947
	distance (μm)	mean	std dev		mean	std dev		mean	std dev		6-OHDA	+chronic-LD																			95% CI lower	2917	4719	4530		95% CI lower	176.7	276.4	268		95% CI lower	198.2	260.8	263.3		95% CI lower	4.593	5.544	5.719
	10	1.61538	0.869718		1.71429	1.11744		2	1.56347		0.9989	0.986																			95% CI upper	4341	8182	10499		95% CI upper	256.2	467.9	572.1		95% CI upper	257.2	307.8	314.5		95% CI upper	6.022	8.027	8.176
	20	6	1.29099		7.46429	3.77597		8.78947	3.30956		0.7971	0.5122																			std dev	1178	4465	6193		std dev	65.78	247	315.5		std dev	48.85	60.52	53.11		std dev	1.182	3.201	2.549
	30	9.15385	2.30384		12.6071	7.99694		12.6316	6.27349		0.3272	0.3686																			SEM	326.7	843.8	1421		SEM	18.24	46.67	72.37		SEM	13.55	11.44	12.19		SEM	0.3279	0.605	0.5848
	40	11.9231	3.47519		17.25	9.51655		15.3684	7.38776		0.0894	0.3748
	50	14.9231	4.71631		21.1786	10.8459		18.1579	6.77629		0.04	0.4165																			median	3802	5038	4777		median	229	286	294		median	230	270	290		median	5	6	6
	60	16.1538	3.67074		25.5714	13.5193		19.2105	10.2609		0.0012	0.4536																			95% CI lower	2448	4415	3746		95% CI lower	133	235	225		95% CI lower	180	240	250		95% CI lower	4	5	5
	70	18	4.20317		25.8214	12.0985		22.4211	13.5741		0.0081	0.2161																			95% CI upper	4517	6400	7658		95% CI upper	256	372	445		95% CI upper	270	320	330		95% CI upper	7	7	9
	80	19.4615	6.71584		25.6429	12.2873		25.3158	14.349		0.0428	0.0803																			MAD	715.411	1445.61	1071.18		MAD	36	73	82		MAD	40	40	40		MAD	1	1	1
	90	20.0769	10.8279		24.1786	11.5824		24.5263	15.3129		0.2192	0.2125
	100	15.8462	7.49273		23.8214	13.4083		24.9474	14.7063		0.0068	0.0037																			Stat. test	Kruskal-Wallis test		P = 0.0166		Stat. test	Kruskal-Wallis test		P = 0.0219		Stat. test	Kruskal-Wallis test		P = 0.0094		Stat. test	Kruskal-Wallis test		P = 0.1422
	110	14.2308	6.73491		21.2143	12.816		22.7368	15.9438		0.0197	0.0071																				Dunn's multiple comparison test					Dunn's multiple comparison test					Dunn's multiple comparison test
	120	11.3077	5.40655		20.8214	12.4664		20.8421	20.8494		0.001	0.0023																				sham vs. 6-OHDA		P = 0.0234			sham vs. 6-OHDA		P = 0.0311			sham vs. 6-OHDA		P = 0.0253		Data	sham	6-OHDA	+chronic-LD
	130	10.3077	5.58845		18.3929	12.494		18.3684	16.8233		0.006	0.0113																				sham vs. +chronic-LD		P = 0.0364			sham vs. +chronic-LD		P = 0.0454			sham vs. +chronic-LD		P = 0.0124			4	19	6
	140	8.84615	4.33678		16.75	14.7086		17	17.2434		0.0074	0.0103																				6-OHDA vs. +chronic-LD		P > 0.9999			6-OHDA vs. +chronic-LD		P > 0.9999			6-OHDA vs. +chronic-LD		P > 0.9999			6	9	6
	150	7.38462	3.59487		15.7143	14.827		14.1053	15.3583		0.0045	0.0396																																			5	5	5
	160	7.15385	5.2733		14.0714	15.837		13.7895	14.9688		0.0211	0.0426																			Data	sham	6-OHDA	+chronic-LD		Data	sham	6-OHDA	+chronic-LD		Data	sham	6-OHDA	+chronic-LD			7	4	10
	170	5	3.91578		11.1071	10.9826		10.5789	11.2562		0.0458	0.0987																				3190.84	11520.2	7658.11			193	670	445			240	270	280			7	9	5
	180	3.92308	3.56982		9.5	10.6092		8.52632	10.118		0.0727	0.1929																				3987.52	4625.11	4776.54			229	259	302			180	210	380			4	5	5
	190	3	2.70801		8.96429	9.41819		7.78947	9.17472		0.0521	0.1711																				3801.99	1944.06	4496.89			239	127	266			270	210	300			5	5	4
	200	2.38462	2.06311		7.60714	10.0971		7.05263	9.93576		0.0971	0.1851																				4422.94	2790.04	6655.89			256	152	406			270	190	250			7	5	7
	210	1.69231	1.4367		6.64286	8.73144		6.84211	7.56647		0.12	0.1342																				5727.37	6566.59	2720.73			337	355	181			300	240	270			5	2	6
	220	2.07692	3.06761		6.07143	8.80626		4.57895	5.25268		0.2349	0.5784																				4517.4	3538.06	3705.36			252	211	225			220	310	300			4	4	5
	230	1.23077	1.42325		5.21429	7.80008		3.84211	4.93585		0.2366	0.553																				5220.41	3647.66	5325.57			302	218	305			300	290	260			6	7	6
	240	0.769231	1.30089		4.21429	6.45415		3.84211	5.50013		0.3288	0.4502																				2937.55	6334.25	2913.08			187	372	178			210	340	350			5	6	5
	250	1	1.87083		3.64286	5.26494		3.78947	6.81973		0.5022	0.5122																				2448.46	4414.64	5021.95			133	235	294			170	230	320			4	9	6
	260	1.23077	2.86222		3.07143	5.1491		3.15789	5.41872		0.7038	0.7149																				1975.57	4655.15	4042.28			122	278	227			140	250	220				7	11
	270	0.923077	1.97744		3.14286	5.62872		1.94737	3.20544		0.607	0.9061																				1842.45	2743.1	4753.01			121	172	277			200	270	240				7	12
	280	0.384615	0.960769		2.07143	4.25944		1.68421	2.68851		0.7429	0.8545																				3294.59	4649.57	4098.52			214	258	254			230	240	290				11	12
	290	0.230769	0.599145		1.57143	2.80777		1.26316	1.99561		0.8259	0.9047																				3807.24	3843.1	3746.33			229	215	212			230	260	190				5	7
	300	0.230769	0.599145		1.17857	2.09149		1	1.82574		0.9074	0.9455																					3195.59	20587.7				206	1049				230	360				5	9
	310	0	0		1.53571	2.54562		0.473684	0.904828		0.7799	0.9788																					5204.01	18532.7				294	1025				240	330				5	5
	320	0	0		1	2.12568		0.526316	1.07333		0.8977	0.974																					5658.78	22093.5				331	1154				270	310				6
	330	0	0		0.785714	2.0066		0.368421	0.830698		0.9351	0.9871																					3527.26	5312.61				227	301				270	220				6
	340	0	0		0.607143	1.61794		0.315789	0.82007		0.9605	0.9905																					9849.15	13025.8				544	691				320	360				8
	350	0	0		0.428571	1.13622		0.210526	0.535303		0.98	0.9958																					6399.97	3310.93				390	189				330	260				6
	360	0	0		0.571429	2.00792		0.105263	0.315302		0.9649	0.999																					4721.9					269					230					7
	370	0	0		0.392857	1.54774		0.0526316	0.229416		0.9832	0.9997																					5211.3					322					320					4
	380	0	0		0.214286	0.786796		0.0526316	0.229416		0.995	0.9997																					23941.9					1317					400					5
	390	0	0		0.107143	0.41627		0	0		0.9987	>0.9999																					13425.5					772					350					11
	400	0	0		0.107143	0.41627		0	0		0.9987	>0.9999																					11160.6					665					430					8
																																	7051.7					400					350
stat. test	Two-way ANOVA - repeated measures				Factors:	Group	P = 0.1158																										4872.93					271					260
						Distance from soma	P < 0.0001																										5495.74					342					270
																																	9623.26					549					380
						interaction	P = 0.0074
				Dunnett's multiple comparison test	multiple distances with difference from sham
					see table above
Data	sham
	distance (μm)	1	2	3	4	5	6	7	8	9	10	11	12	13
	10	1	1	3	1	1	2	1	1	1	1	2	3	3
	20	6	6	8	7	7	4	6	8	5	5	6	6	4
	30	8	7	14	8	13	9	9	11	7	10	9	7	7
	40	8	16	12	10	18	10	14	13	10	17	11	7	9
	50	17	27	12	13	16	13	11	20	14	16	15	12	8
	60	12	22	15	16	23	15	16	18	15	14	13	20	11
	70	15	24	13	23	24	20	19	21	16	17	13	17	12
	80	16	21	16	20	36	27	24	17	14	14	11	22	15
	90	23	23	16	21	44	39	18	15	9	10	7	16	20
	100	15	15	12	28	29	18	24	13	10	7	4	17	14
	110	18	16	14	23	21	22	20	7	6	5	4	15	14
	120	8	11	18	14	19	15	14	7	6	2	4	14	15
	130	7	11	15	13	15	20	14	6	4	2	3	9	15
	140	6	11	8	12	13	12	14	5	3	2	5	9	15
	150	6	11	5	9	9	12	10	7	3	0	5	7	12
	160	4	4	7	8	5	3	21	7	7	0	4	11	12
	170	4	2	8	5	4	2	14	3	3	0	2	9	9
	180	3	1	11	4	4	2	9	2	0	0	1	6	8
	190	3	0	9	6	5	2	4	2	0	0	1	2	5
	200	3	0	7	2	3	2	4	2	0	0	1	2	5
	210	3	0	3	1	3	2	4	2	0	0	0	1	3
	220	3	0	2	1	4	1	4	0	0	0	0	1	11
	230	3	0	2	1	4	0	3	0	0	0	0	1	2
	240	1	0	1	1	4	0	3	0	0	0	0	0	0
	250	0	0	6	1	3	0	3	0	0	0	0	0	0
	260	0	0	1	1	4	0	10	0	0	0	0	0	0
	270	0	0	1	7	2	0	2	0	0	0	0	0	0
	280	0	0	0	0	2	0	3	0	0	0	0	0	0
	290	0	0	0	0	1	0	2	0	0	0	0	0	0
	300	0	0	0	0	1	0	2	0	0	0	0	0	0
	310	0	0	0	0	0	0	0	0	0	0	0	0	0
	320	0	0	0	0	0	0	0	0	0	0	0	0	0
	330	0	0	0	0	0	0	0	0	0	0	0	0	0
	340	0	0	0	0	0	0	0	0	0	0	0	0	0
	350	0	0	0	0	0	0	0	0	0	0	0	0	0
	360	0	0	0	0	0	0	0	0	0	0	0	0	0
	370	0	0	0	0	0	0	0	0	0	0	0	0	0
	380	0	0	0	0	0	0	0	0	0	0	0	0	0
	390	0	0	0	0	0	0	0	0	0	0	0	0	0
	400	0	0	0	0	0	0	0	0	0	0	0	0	0
	6-OHDA
	distance (μm)	1	2	3	4	5	6	7	8	9	10	11	12	13	14	15	16	17	18	19	20	21	22	23	24	25	26	27	28
	10	5	1	4	2	1	2	4	3	1	1	2	2	1	1	1	1	1	1	2	1	1	1	1	1	1	2	1	3
	20	23	6	7	4	6	10	10	7	4	7	6	5	6	6	6	9	6	5	6	4	5	10	10	10	6	6	13	6
	30	46	13	9	5	12	8	14	7	8	10	6	7	9	6	13	22	8	16	12	11	7	19	11	16	19	9	20	10
	40	48	24	11	5	22	13	18	8	12	15	8	19	10	11	21	29	10	15	16	13	8	32	13	34	18	9	22	19
	50	48	19	13	6	28	15	32	12	20	19	10	22	16	13	20	36	12	24	18	17	12	50	18	37	22	10	22	22
	60	59	35	14	9	27	17	18	25	23	11	11	32	14	26	20	36	19	20	23	19	21	69	22	43	24	19	32	28
	70	59	35	13	11	24	21	15	23	25	17	12	24	16	21	20	38	24	21	30	17	21	53	31	48	24	14	31	35
	80	57	29	8	11	34	21	13	30	26	18	19	30	16	18	24	33	23	36	25	17	16	63	36	30	24	14	22	25
	90	42	22	5	10	26	17	12	38	19	18	17	26	17	9	27	25	20	23	24	18	18	53	47	39	19	21	26	39
	100	37	15	5	10	33	14	18	34	19	18	18	21	17	7	26	17	17	41	20	17	20	60	53	48	19	16	21	26
	110	30	15	5	10	22	9	8	22	21	17	11	15	15	8	18	13	14	40	23	24	17	64	46	32	25	14	28	28
	120	22	14	8	10	15	9	11	22	12	18	8	15	17	15	26	11	9	37	31	19	20	58	41	47	24	15	18	31
	130	21	8	8	10	18	8	7	21	11	16	12	10	10	8	18	8	11	27	16	14	16	60	46	35	29	15	21	31
	140	19	10	3	11	20	5	5	13	6	14	7	7	7	10	16	6	8	25	19	17	16	69	57	26	23	16	11	23
	150	25	4	3	15	23	3	7	11	5	20	6	5	7	13	11	6	7	20	17	11	24	79	34	18	18	13	9	26
	160	21	2	2	14	12	3	4	9	5	18	3	7	5	6	7	7	9	12	11	12	14	83	39	20	25	13	9	22
	170	25	2	2	5	11	3	4	9	5	12	3	4	7	3	3	5	6	12	20	7	12	53	22	21	11	8	8	28
	180	21	2	2	3	5	2	3	9	2	9	2	1	4	5	3	6	4	11	13	7	11	53	18	13	11	11	8	27
	190	16	1	2	1	4	2	3	12	2	7	1	1	9	6	2	4	4	16	10	12	10	46	18	11	8	20	4	19
	200	13	1	2	0	3	3	2	9	2	7	1	1	3	4	3	4	4	9	5	4	9	47	32	9	7	9	2	18
	210	11	1	1	0	3	3	1	6	2	1	1	1	2	5	3	5	3	18	5	3	5	40	25	10	8	6	2	15
	220	11	0	0	0	2	4	1	6	2	1	1	1	2	3	2	4	2	21	4	2	5	42	18	12	5	6	2	11
	230	5	0	0	0	2	4	1	6	3	1	1	1	2	2	2	2	2	24	6	0	5	34	18	10	4	2	2	7
	240	2	0	0	0	2	2	1	6	0	2	2	1	1	0	2	1	1	14	9	0	5	30	14	9	3	1	2	8
	250	2	0	0	0	0	2	2	6	0	1	2	0	1	0	0	1	1	13	4	0	4	21	14	12	4	1	4	7
	260	1	0	0	0	0	3	1	3	0	0	1	0	1	0	0	1	1	11	3	0	3	17	20	6	3	1	1	9
	270	1	0	0	0	0	3	1	3	0	0	1	0	0	0	0	1	1	12	5	0	3	21	20	7	2	0	1	6
	280	0	0	0	0	0	1	1	2	0	0	0	0	0	0	0	0	0	6	3	0	2	13	18	7	2	0	0	3
	290	0	0	0	0	0	1	1	3	0	0	0	0	0	0	0	0	0	5	2	0	4	12	7	5	2	0	0	2
	300	0	0	0	0	0	1	0	1	0	0	0	0	0	0	0	0	0	3	2	0	3	7	7	5	1	0	0	3
	310	0	0	0	0	0	2	0	3	0	0	0	0	0	0	0	0	0	2	4	0	4	7	9	6	1	0	0	5
	320	0	0	0	0	0	0	0	1	0	0	0	0	0	0	0	0	0	4	1	0	1	9	3	6	2	0	0	1
	330	0	0	0	0	0	0	0	1	0	0	0	0	0	0	0	0	0	0	1	0	0	7	1	8	3	0	0	1
	340	0	0	0	0	0	0	0	1	0	0	0	0	0	0	0	0	0	0	0	0	0	5	1	7	2	0	0	1
	350	0	0	0	0	0	0	0	0	0	0	0	0	0	0	0	0	0	0	0	0	0	5	2	3	1	0	0	1
	360	0	0	0	0	0	0	0	0	0	0	0	0	0	0	0	0	0	0	0	0	0	9	0	6	0	0	0	1
	370	0	0	0	0	0	0	0	0	0	0	0	0	0	0	0	0	0	0	0	0	0	8	0	2	0	0	0	1
	380	0	0	0	0	0	0	0	0	0	0	0	0	0	0	0	0	0	0	0	0	0	4	0	1	0	0	0	1
	390	0	0	0	0	0	0	0	0	0	0	0	0	0	0	0	0	0	0	0	0	0	2	0	1	0	0	0	0
	400	0	0	0	0	0	0	0	0	0	0	0	0	0	0	0	0	0	0	0	0	0	2	0	1	0	0	0	0
	+chronic-LD
	distance (μm)	1	2	3	4	5	6	7	8	9	10	11	12	13	14	15	16	17	18	19
	10	1	5	1	1	1	4	1	1	3	1	1	2	5	1	1	1	1	2	5
	20	12	8	6	11	9	7	5	6	8	8	9	9	6	20	11	8	9	9	6
	30	13	11	6	20	12	10	9	7	9	15	15	6	11	33	16	15	15	6	11
	40	20	11	16	23	11	13	12	7	11	17	23	6	9	27	31	17	23	6	9
	50	20	16	26	36	10	15	15	10	14	21	20	14	11	26	25	21	20	14	11
	60	24	19	14	32	9	14	14	11	17	21	18	8	16	49	36	21	18	8	16
	70	36	21	15	28	7	17	20	12	24	15	29	10	15	49	59	15	29	10	15
	80	35	27	16	31	7	19	24	16	17	22	27	11	24	65	56	22	27	11	24
	90	41	21	17	34	9	14	29	18	23	15	17	13	23	62	62	15	17	13	23
	100	31	20	16	34	7	25	24	12	19	21	16	22	21	65	61	21	16	22	21
	110	35	26	15	32	5	18	28	10	19	13	13	20	14	69	55	13	13	20	14
	120	25	18	14	24	7	8	20	5	15	11	12	11	19	88	66	11	12	11	19
	130	30	10	14	15	5	10	31	7	19	12	11	8	12	71	51	12	11	8	12
	140	31	8	9	16	5	8	19	4	13	10	10	9	13	65	61	10	10	9	13
	150	18	11	10	11	5	5	13	3	12	8	10	9	7	48	64	8	10	9	7
	160	11	9	12	11	11	5	13	3	9	4	9	22	3	37	65	4	9	22	3
	170	9	9	8	11	8	4	8	3	6	3	8	17	1	29	48	3	8	17	1
	180	9	6	11	5	6	4	4	3	7	4	6	8	1	24	45	4	6	8	1
	190	10	3	13	5	9	4	5	3	5	1	4	8	1	26	37	1	4	8	1
	200	7	4	6	5	6	3	2	3	7	1	4	7	0	26	41	1	4	7	0
	210	10	4	4	8	5	2	4	3	10	2	8	4	0	21	31	2	8	4	0
	220	5	3	2	6	5	2	1	2	7	2	3	4	0	14	22	2	3	4	0
	230	2	5	2	4	8	1	1	2	5	0	2	3	0	15	18	0	2	3	0
	240	2	2	3	1	4	1	1	6	4	0	2	4	0	21	16	0	2	4	0
	250	3	2	4	2	4	1	1	1	1	0	0	4	0	25	20	0	0	4	0
	260	2	2	2	0	3	1	1	1	1	0	0	8	0	22	9	0	0	8	0
	270	2	2	1	0	3	1	0	1	1	0	0	3	0	13	7	0	0	3	0
	280	1	2	1	0	0	5	0	1	2	0	0	3	0	11	3	0	0	3	0
	290	0	2	1	0	0	2	0	3	3	0	0	1	0	8	3	0	0	1	0
	300	0	2	1	0	0	2	0	7	1	0	0	0	0	4	2	0	0	0	0
	310	0	2	0	0	0	0	0	2	1	0	0	0	0	3	1	0	0	0	0
	320	0	2	0	0	0	0	0	2	1	0	0	0	0	4	1	0	0	0	0
	330	0	2	0	0	0	0	0	1	0	0	0	0	0	3	1	0	0	0	0
	340	0	2	0	0	0	0	0	1	0	0	0	0	0	3	0	0	0	0	0
	350	0	2	0	0	0	0	0	1	0	0	0	0	0	1	0	0	0	0	0
	360	0	1	0	0	0	0	0	0	0	0	0	0	0	1	0	0	0	0	0
	370	0	1	0	0	0	0	0	0	0	0	0	0	0	0	0	0	0	0	0
	380	0	1	0	0	0	0	0	0	0	0	0	0	0	0	0	0	0	0	0
	390	0	0	0	0	0	0	0	0	0	0	0	0	0	0	0	0	0	0	0
	400	0	0	0	0	0	0	0	0	0	0	0	0	0	0	0	0	0	0	0
