# Supplementary material for: Alterations in the intrinsic properties of striatal cholinergic interneurons after dopamine lesion and chronic L-DOPA
Source: eLife. 2020 Jul 20;9:e56920. doi: 10.7554/eLife.56920 (PMC7380940; doi:10.7554/eLife.56920)
Supplement: Figure 3—source data 1. [file elife-56920-fig3-data1.xlsx]

## Sheet: Figure 3
	Figure 3d - Sag amplitude, mV																																										Figure 3f - HCN current density, pA/pF
	Sag amplitude from negative current injection																																										ZD7288-dependent current normalized to capacitance vs. holding potential, mV
group	sham	6-OHDA	+chronic-LD																																							group	sham	6-OHDA	+chronic-LD
N (cells)	39	23	30																																							N (cells)	11	12	13
#mice	18	11	12											Tukey's multiple comparison test																												#mice	6	6	7
														P-values
mean data		sham				6-OHDA				+chronic-LD				sham vs.	sham vs.	6-OHDA vs.																										mean data		sham				6-OHDA
	current, pA	mean	std dev	SEM		mean	std dev	SEM		mean	std dev	SEM		6-OHDA	chron-LD	chron-LD																											potential, mV	mean	std dev	SEM		mean	std dev
	-200	-15.567	3.47171	0.555919		-13.5652	3.6573	0.762599		-16.4964	4.49369	0.820431		0.0971	0.619	0.0308																											-140	-1.24585	0.47346	0.142753		-0.987217	0.335827
	-250	-16.6222	4.77771	0.765046		-13.4055	4.43885	0.925564		-17.8655	6.90306	1.26032		0.0266	0.6781	0.0171																											-130	-1.22204	0.441936	0.133249		-0.9478	0.33443
	-300	-17.1937	5.13003	0.821463		-14.6285	5.79065	1.20743		-19.0258	9.6692	1.76535		0.1967	0.6178	0.1099																											-120	-1.20091	0.442787	0.133505		-0.862673	0.328911
																																											-110	-1.11273	0.383143	0.115522		-0.791664	0.350948
stat. test	Two-way ANOVA - repeated measures				Factors:	Group	P = 0.0255																																				-100	-0.935347	0.302534	0.0912173		-0.592882	0.339749
						Current	P = 0.0017																																				-90	-0.623993	0.20223	0.0609745		-0.396112	0.239619
																																											-80	-0.287575	0.113484	0.0342169		-0.189227	0.137152
						interaction	P = 0.5357																																				-70	-0.0657308	0.0737977	0.0222508		-0.0463298	0.0855136
																																											-60	0.00291329	0.0443139	0.0133612		0.00457145	0.037877
Data	sham
	current, pA	1	2	3	4	5	6	7	8	9	10	11	12	13	14	15	16	17	18	19	20	21	22	23	24	25	26	27	28	29	30	31	32	33	34	35	36	37	38	39		stat. test	Two-way ANOVA - repeated measures				Factors:	Group	P = 0.0699
	-200	-17.5178	-12.0857	-13.7267	-16.7033	-19.1274	-18.9409	-17.456	-18.2473	-22.5498	-15.3697	-17.7005	-16.8031	-17.6106	-20.6857	-10.7453	-15.688	-12.8162	-13.194	-14.7829	-19.5932	-9.94909	-13.3611	-15.1021	-13.345	-8.59433	-14.6421	-19.6541	-17.4889	-15.6444	-13.9697	-16.7589	-12.0331	-17.3576	-8.10538	-10.7113	-12.269	-16.6076	-20.74	-19.4336								Voltage	P < 0.0001
	-250	-17.7705	-14.835	-15.188	-17.8181	-20.5105	-22.5546	-18.0946	-18.3954	-24.343	-16.1367	-18.6858	-17.3648	-19.8433	-21.7374	-13.3978	-17.0581	-15.5221	-14.8606	-14.2074	-27.779	-9.11747	-12.6064	-22.8372	-13.6981	-9.3466	-12.3919	-19.873	-18.98	-14.0482	-13.3481	-26.8993	-11.3065	-16.8841	-5.78816	-8.97876	-12.5125	-16.7315	-18.8758	-17.9381
	-300	-18.8864	-15.4186	-16.0104	-18.1918	-20.3482	-23.0636	-18.3957	-18.855	-25.5655	-16.1238	-19.2861	-17.5867	-20.533	-22.4688	-15.973	-18.0644	-16.8203	-16.1659	-16.1059	-26.8597	-10.9183	-12.8459	-28.7522	-14.6364	-10.4373	-13.2077	-18.8953	-23.6703	-12.3837	-14.3601	-27.3835	-11.3384	-16.1346	-4.54151	-8.82372	-12.5037	-15.6631	-16.6561	-16.6806								interaction	P = 0.0025
	6-OHDA																																									Data	sham
	current, pA	1	2	3	4	5	6	7	8	9	10	11	12	13	14	15	16	17	18	19	20	21	22	23																			potential, mV	1	2	3	4	5	6
	-200	-13.8292	-15.3103	-4.35268	-8.03326	-14.8465	-16.4527	-11.8141	-9.40703	-8.14968	-9.08868	-15.6986	-17.2593	-19.6156	-13.5259	-15.1784	-16.8615	-15.0254	-12.21	-14.0767	-18.208	-14.3828	-14.1686	-14.5052																			-140	-0.713685	-0.726011	-0.697661	-0.869406	-1.20098	-1.80232
	-250	-12.5528	-9.49581	-2.85739	-5.98533	-16.2068	-16.6526	-11.4348	-7.9412	-6.67399	-10.6188	-15.4232	-17.7795	-20.4419	-15.1172	-16.2495	-16.8003	-13.1893	-12.4855	-14.597	-19.126	-15.9434	-14.5358	-16.2189																			-130	-0.635208	-0.724779	-0.746966	-0.937611	-1.27009	-1.80417
	-300	-11.6465	-15.3242	-2.42083	-4.07796	-13.3369	-16.9134	-10.9933	-30.7395	-6.6939	-11.0166	-16.0047	-18.4528	-21.819	-15.3314	-16.8921	-17.0451	-13.2505	-13.3729	-14.6582	-19.5238	-14.5664	-15.7904	-16.5861																			-120	-0.551801	-0.715739	-0.773262	-0.980341	-1.17416	-1.76529
																																											-110	-0.499621	-0.7256	-0.773262	-0.971302	-1.04016	-1.62617
	chronic-LD																																										-100	-0.415803	-0.693141	-0.734229	-0.790518	-0.88379	-1.32343
	current, pA	1	2	3	4	5	6	7	8	9	10	11	12	13	14	15	16	17	18	19	20	21	22	23	24	25	26	27	28	29	30												-90	-0.318426	-0.47579	-0.506195	-0.570291	-0.44685	-0.901667
	-200	-14.7539	-26.0023	-17.3695	-16.7564	-6.2604	-16.0321	-10.0493	-26.2085	-13.2926	-18.7629	-12.4916	-11.145	-9.80504	-10.8466	-17.4735	-18.0856	-18.7894	-18.5446	-16.8921	-12.0876	-14.5358	-17.7183	-19.7075	-16.8615	-18.0244	-16.4331	-20.7173	-20.4725	-16.8615	-21.9108												-80	-0.196808	-0.236252	-0.301991	-0.267889	-0.0820776	-0.427529
	-250	-13.4962	-33.2756	-16.9615	-17.0113	-5.21327	-16.07	-19.9571	-41.5504	-13.1311	-18.7636	-9.1301	-11.4418	-8.14056	-10.8866	-18.208	-19.3096	-20.0441	-20.5643	-17.9938	-13.7707	-14.3522	-18.7282	-19.4626	-18.514	-19.432	-16.4943	-21.4211	-22.2168	-17.2899	-23.1348												-70	-0.0871049	-0.0587547	-0.11792	-0.0953224	0.110352	-0.0798505
	-300	-13.292	-35.5571	-16.3399	-18.5059	-4.34903	-15.3379	-28.3689	-57.6341	-12.932	-18.0567	-6.17169	-12.9666	-7.09468	-11.9993	-17.5653	-19.6156	-20.6561	-20.6867	-18.4834	-13.4647	-15.3008	-19.0342	-18.9424	-19.3096	-25.8584	-16.5861	-21.6048	-22.6146	-17.7489	-24.6955												-60	-0.0283502	-0.0045196	-0.0147914	-0.00410872	0.0807446	0.0836025
																																											6-OHDA
																																											potential, mV	1	2	3	4	5	6
																																											-140	-1.09884	-0.916049	-0.857775	-0.835019	-1.31313	-0.513305
																																											-130	-1.245	-0.774518	-0.839525	-0.753492	-1.16142	-0.452852
																																											-120	-1.24892	-0.727713	-0.804037	-0.712309	-1.24873	-0.404069
																																											-110	-1.08057	-0.567237	-0.69859	-0.620276	-1.23227	-0.354506
																																											-100	-0.946802	-0.460811	-0.511015	-0.447557	-1.10632	-0.236695
																																											-90	-0.672093	-0.354941	-0.293023	-0.248363	-0.838686	-0.103974
																																											-80	-0.332131	-0.242942	-0.106461	-0.0991769	-0.468004	-0.0172561
																																											-70	-0.232949	-0.0936108	-0.0547516	-0.0302574	-0.153855	-0.00505551
																																											-60	-0.0476338	-0.045691	0.00709743	0.00798458	-0.0372113	-0.00330446
																																											chronic-LD
																																											potential, mV	1	2	3	4	5	6
																																											-140	-0.692069	-2.07785	-0.856091	-1.04964	-0.762655	-1.68754
																																											-130	-0.651051	-2.37223	-0.79179	-1.33669	-0.754805	-1.52641
																																											-120	-0.631851	-2.55787	-0.824688	-1.50139	-0.772132	-1.36135
																																											-110	-0.600433	-2.45046	-0.701322	-1.52007	-0.625512	-1.11942
																																											-100	-0.559415	-1.99564	-0.532346	-1.41388	-0.378408	-0.838917
																																											-90	-0.431996	-1.33264	-0.358885	-1.09364	-0.0916777	-0.437827
																																											-80	-0.301089	-0.625875	-0.154022	-0.635919	0.0528249	-0.151945
																																											-70	-0.140508	-0.141883	-0.0575712	-0.128801	0.0898298	-0.0185913
																																											-60	-0.0226908	-0.0397802	-0.0284117	0.0715089	0.0819133	-0.00656654
[truncated: 41 more columns]
