# Supplementary material for: Alterations in the intrinsic properties of striatal cholinergic interneurons after dopamine lesion and chronic L-DOPA
Source: eLife. 2020 Jul 20;9:e56920. doi: 10.7554/eLife.56920 (PMC7380940; doi:10.7554/eLife.56920)
Supplement: Figure 4—source data 1. [file elife-56920-fig4-data1.xlsx]

## Sheet: Figure 4
	Figure4b - Ba2+-sensitive peak current density					Figure 4b - Ba2+-sensitive late current density					Figure 4d - apamin-sensitive peak current density					Figure 4d - apamin-sensitive late current density					Figure 5e - SK-channel mRNA
	Ba2+-sensitive peak AHP current, pA/pF					Ba2+-sensitive late AHP current, pA/pF					Apamin-sensitive peak AHP current, pA/pF					Apamin-sensitive late AHP current, pA/pF					mRNA isolated from striatal cholinergic interneurons from ChAT-Cre:Ribotag mice
group	sham	6-OHDA	+chronic-LD		group	sham	6-OHDA	+chronic-LD		group	sham	6-OHDA	+chronic-LD		group	sham	6-OHDA	+chronic-LD			Striatal tissue from 3-4 mice were pooled for each replicate
N (cells)	9	10	9		N (cells)	9	10	9		N (cells)	17	14	14		N (cells)	17	13	14
#mice	3	3	3		#mice	3	3	3		#mice	5	4	4		#mice	5	4	4
																				group	sham	6-OHDA	+chronic-LD
mean	0.309	0.418	0.5112		mean	0.08903	0.1549	0.1546		mean	0.2525	0.115	0.1325		mean	0.01915	0.01883	0.005061		N	6	4	6
95% CI lower	0.1792	0.3446	0.3824		95% CI lower	0.05133	0.1096	0.09974		95% CI lower	0.1856	0.06081	0.04784		95% CI lower	0.002783	-0.009194	-0.004091		#mice	20	17	22
95% CI upper	0.4387	0.4913	0.6401		95% CI upper	0.1267	0.2002	0.2094		95% CI upper	0.3194	0.1692	0.2172		95% CI upper	0.03552	0.04686	0.01421
std dev	0.1687	0.1025	0.1676		std dev	0.04905	0.06337	0.07131		std dev	0.1301	0.09388	0.1467		std dev	0.03184	0.04638	0.01585			Kcnn1:actin					Kcnn2:actin					Kcnn3:actin
SEM	0.05624	0.03243	0.05588		SEM	0.01635	0.02004	0.02377		SEM	0.03156	0.02509	0.0392		SEM	0.007722	0.01286	0.004236			sham	6-OHDA	+chronic-LD			sham	6-OHDA	+chronic-LD			sham	6-OHDA	+chronic-LD
																				mean	0.0042	0.003173	0.004057		mean	0.005188	0.00472	0.004673		mean	0.01751	0.01652	0.01531
median	0.306	0.4105	0.5839		median	0.08468	0.1414	0.122		median	0.2724	0.0936	0.08349		median	0.02023	0.01445	0		95% CI lower	0.003407	0.002347	0.003082		95% CI lower	0.003553	0.002711	0.003134		95% CI lower	0.01569	0.009081	0.01245
95% CI lower	0.1131	0.3047	0.3146		95% CI lower	0.03597	0.1111	0.09409		95% CI lower	0.1533	0	0		95% CI lower	0.002656	-0.009457	-0.0113		95% CI upper	0.004993	0.003998	0.005031		95% CI upper	0.006824	0.006729	0.006213		95% CI upper	0.01932	0.02396	0.01818
95% CI upper	0.4901	0.5041	0.6862		95% CI upper	0.1382	0.2121	0.2657		95% CI upper	0.3271	0.2256	0.3215		95% CI upper	0.03103	0.02826	0.01675		std dev	0.0007555	0.0005188	0.0009289		std dev	0.001559	0.001263	0.001467		std dev	0.001734	0.004677	0.002733
MAD	0.152531	0.0583222	0.143566		MAD	0.048709	0.0161964	0.033558		MAD	0.0797574	0.0829695	0.0834917		MAD	0.0175698	0.0144539	0.00998957		SEM	0.0003084	0.0002594	0.0003792		SEM	0.0006364	0.0006313	0.0005989		SEM
Stat. test	Kruskal-Wallis test		P = 0.0873		Stat. test	Kruskal-Wallis test		P = 0.0756		Stat. test	Kruskal-Wallis test		P = 0.0094		Stat. test	Kruskal-Wallis test		P = 0.1953		median	0.004295	0.003285	0.00384		median	0.004845	0.004595	0.00421		median	0.01744	0.01731	0.01552
											Dunn's multiple comparison test									95% CI lower	0.00318	0.00248	0.00314		95% CI lower	0.00349	0.00348	0.00352		95% CI lower	0.01542	0.01096	0.01084
Data	sham	6-OHDA	+chronic-LD		Data	sham	6-OHDA	+chronic-LD			sham vs. 6-OHDA		P = 0.0206		Data	sham	6-OHDA	+chronic-LD		95% CI upper	0.00532	0.00364	0.00537		95% CI upper	0.00722	0.00621	0.0074		95% CI upper	0.02018	0.02052	0.01907
	0.113099	0.277252	0.68624			0.063211	0.131926	0.189302			sham vs. +chronic-LD		P = 0.0381			-0.03633	0.0138276	0.0404353		MAD	0.000475	0.00028	0.000675		MAD	0.001195	0.00091	0.00062		MAD	0.00129	0.003085	0.001175
	0.108903	0.475069	0.349626			0.0124241	0.0643143	0.117153			6-OHDA vs. +chronic-LD		P > 0.9999			0.00170973	0.0226511	0.0167493
	0.444754	0.416686	0.314551			0.138207	0.111107	0.082578								0.0207183	0.0226083	0.0292919		Stat. test	Kruskal-Wallis test		P = 0.1435		Stat. test	Kruskal-Wallis test		P = 0.8698		Stat. test	Kruskal-Wallis test		P = 0.3750
	0.216576	0.384098	0.727452			0.0725412	0.157516	0.266856		Data	sham	6-OHDA	+chronic-LD			0.0211533	0.0149538	0.0101295
	0.30602	0.421777	0.583886			0.0846816	0.300486	0.155515			0.304299	0.0865828	0.327432			0.0192384	-0.029192	-0.0016177		Data	Kcnn1:actin					Kcnn2:actin					Kcnn3:actin
	0.399384	0.404381	0.413516			0.134312	0.131009	0.097881			0.370359	0.0496612	0.0629421			0.00265622	-0.00945731	0			sham	6-OHDA	+chronic-LD			sham	6-OHDA	chronic-LD			sham	6-OHDA	chronic-LD
	0.490136	0.304695	0.297596			0.100062	0.147451	0.121957			0.268484	0.133771	0.0798441			0.0219002	0.0485386	-0.0112998			0.00414	0.00248	0.00319			0.00349	0.00621	0.00376			0.01542	0.01096	0.01084
	0.548191	0.358424	0.636298			0.159826	0.135405	0.094089			0.338041	0.0979597	0.268043			0.011502	0.0282591	0.0096092			0.00358	0.00308	0.00496			0.00381	0.00389	0.00366			0.01599	0.01435	0.01511
	0.15349	0.633425	0.591939			0.0359726	0.212074	0.265703			0.301784	0.225612	0.437279			0.0458452	0	-0.00397147			0.00318	0.00349	0.00314			0.00481	0.0053	0.00466			0.01765	0.02052	0.01429
		0.504122					0.157733				0.0456673	0.183559	0.0871393			-0.0394785	0.15408	-0.0166592			0.00445	0.00364	0.00537			0.00692	0.00348	0.00352			0.01722	0.02026	0.01664
											0.0814058	0.169572	0.0160033			0.00870579	-0.0301862	-0.0116611			0.00453		0.00405			0.00722		0.0074			0.02018		0.01907
											0.110105	0.241581	0.151854			0.031029	0.0144539	0			0.00532		0.00363			0.00488		0.00504			0.01857		0.01593
											0.296117	0.0494456	0.103409			0.020226	-0.00568616	0.00984962
											0.153277	0.2832	0.32146			0.047082		0
											0.0569893	0	0			0.086886
											0.192645	0	0			0.06619
											0.506737	0.0892322	0			-0.00343
											0.419272	0	0
											0.272402
											0.24815
											0.327123
