# Supplementary material for: Alterations in the intrinsic properties of striatal cholinergic interneurons after dopamine lesion and chronic L-DOPA
Source: eLife. 2020 Jul 20;9:e56920. doi: 10.7554/eLife.56920 (PMC7380940; doi:10.7554/eLife.56920)
Supplement: Figure 5—source data 1. [file elife-56920-fig5-data1.xlsx]

## Sheet: Figure 5
	Figure 5b - ZD7288 Ih inhibition curve											Figure 5c - apamin inhibition curve											Figure 5d - Firing rate, Hz					Figure 5e - Firing rate, Hz							Figure 5f - sAP CV					Figure 5g - sAP CV
	HCN current density vs. [ZD8288] μM; %max inhibition vs. [ZD7288], μM											Peak AHP current density vs. [apamin], nM; %max inhibition vs. [apamin], nM											slices from wildtype unlesioned mice					Same data as in 6d plotted before and after							CV of instantaneous sAP frequency with HCN- and					Same data as in 6f plotted before and after
																							sAP firing rate with HCN- and SK-channel blockers					addtion of channel blockers.							SK-channel blockers from 6d					addtion of channel blockers.
group	unlesioned wildtype mice										group	unlesioned wildtype mice											apamin, 1 nM												apamin, 1 nM
N (cells)	8										N (cells)	6											ZD7288, 1 μM												ZD7288, 1 μM
#mice	2										#mice	2
								% maximum inhibition											% maximum inhibition			group	untreated	apamin+ZD	apamin		group	apamin+ZD	apamin					group	untreated	apamin+ZD	apamin		group	apamin+ZD	apamin
mean data		Ih, pA/pF			% maximum inhibition			Variable slope-least squares fit			mean data		peak AHP, pA/pF			% maximum inhibition			Variable slope-least squares fit			N	17	8	10		N	8	10					N	17	8	10		N	8	10
	[ZD7288], μM	mean	std dev		mean	std dev		Best fit values				[apamin], nM	mean	std dev		mean	std dev		Best fit values			#mice	6	3	3		#mice	3	3					#mice	6	3	3		#mice	3	3
	0.01	1.55662	0.440902		0	0		Hill slope	0.915			0.01	0.510623	0.185102		0	0		Hill slope	4.074
	0.25	1.29587	0.346649		16.2857	18.0159		EC50	1.356			0.5	0.522478	0.138727		8.83333	6.31179		EC50	0.8742		mean	1.82	0.9138	2.678			baseline	apamin+ZD		baseline	apamin		mean	0.4621	0.742	0.552			baseline	apamin+ZD		baseline	apamin
	0.5	1.05842	0.329215		32.375	18.6466		R squared	0.8724			1	0.278475	0.0646962		63.6667	22.1961		R squared	0.8779		95% CI lower	1.43	0.3278	1.975		mean	1.914	0.9138		1.763	2.678		95% CI lower	0.2722	0.3987	0.3229		mean	0.2796	0.742		0.5999	0.552
	2.5	0.712669	0.240003		59	15.9478						2.5	0.179126	0.0665121		96.5	17.7172					95% CI upper	2.209	1.5	3.381		95% CI lower	1.177	0.3278		1.305	1.975		95% CI upper	0.6519	1.085	0.7811		95% CI lower	0.1954	0.3987		0.2925	0.3229
	25	0.122517	0.0823905		100	0						5	0.190626	0.125526		98.6667	24.1964					std dev	0.7582	0.701	0.9826		95% CI upper	2.651	1.5		2.222	3.381		std dev	0.3693	0.4106	0.3203		95% CI upper	0.3638	1.085		0.9072	0.7811
												100	0.182902	0.10036		100	18.3303					SEM	0.1839	0.2478	0.3107		std dev	0.8816	0.701		0.6406	0.9826		SEM	0.08957	0.1452	0.1013		std dev	0.1007	0.4106		0.4296	0.3203
Data	Ih, pA/pF																										SEM	0.3117	0.2478		0.2026	0.3107							SEM	0.03562	0.1452		0.1359	0.1013
	[ZD7288], μM	1	2	3	4	5	6	7	8		Data	peak AHP, pA/pF										median	1.745	0.7962	2.359									median	0.305	0.7255	0.405
	0.01	1.22675	1.93386	2.45479	1.35579	1.0684	1.47982	1.43363	1.49994			[apamin], nM	1	2	3	4	5	6				95% CI lower	1.291	0.08165	1.698		median	1.851	0.7962		1.761	2.359		95% CI lower	0.227	0.165	0.273		median	0.2959	0.7256		0.4178	0.4052
	0.25	0.83525	1.28053	1.70744	1.42931	0.81136	1.49053		1.51666			0.01	0.309649	0.669733	0.741764	0.322947	0.417745	0.601902				95% CI upper	2.15	2.046	4.023		95% CI lower	0.6723	0.08165		1.091	1.698		95% CI upper	0.454	1.469	0.898		95% CI lower	0.1231	0.1652		0.2105	0.2725
	0.5	0.56054	0.91164	1.44208	1.31833	0.62106	1.19195	1.11368	1.30809			0.5	0.466348	0.770355	0.412983	0.583801	0.397892	0.503487				MAD	0.454054	0.508763	0.555858		95% CI upper	3.575	2.046		2.256	4.023		MAD	0.119	0.278	0.139		95% CI upper	0.4236	1.469		1.158	0.8982
	2.5		0.65572	0.78445	0.87333	0.20334	0.83622	0.90328	0.73234			1	0.208057	0.259646	0.398637	0.246631	0.287921	0.269956									MAD	0.50595	0.508763		0.372692	0.555858								0.07734	0.278552		0.242205	0.139173
	25		0.00996	0.05305	0.16797	0.04686	0.17701	0.20555	0.19722			2.5	0.134312	0.113841	0.239015	0.114806	0.208407	0.264377				Stat. test	Kruskal-Wallis test		P = 0.0009									Stat. test	Kruskal-Wallis test		P = 0.1372
												5	0.123074	0.147245	0.399727	0.034079	0.185137	0.254491					Dunn's multiple comparison test				Stat. test	Wilcoxon matched-pairs signed rank test (two-tailed)							Dunn's multiple comparison test				Stat. test	Wilcoxon matched-pairs signed rank test (two-tailed)
	% maximum inhibition											100	0.117004	0.162996	0.322492	0.050545	0.169596	0.274779					untreated vs. apamin+ZD		P = 0.0973			baseline vs. apamin+ZD			P = 0.0078				untreated vs. apamin+ZD		P = 0.1660			baseline vs. apamin+ZD			P = 0.0156
	[ZD7288], μM	1	2	3	4	5	6	7	8														untreated vs. apamin		P = 0.0962			baseline vs. apamin			P = 0.0020				untreated vs. apamin		P = 0.7212			baseline vs. apamin			P = 0.8457
	0.01	0	0	0	0	0	0	0	0			%max inibhition											apamin+ZD vs. apamin		P = 0.0006										apamin+ZD vs. apamin		P > 0.9999
	0.25	32	34	31	-6	25	-1		-1			[apamin], nM	1	2	3	4	5	6									Data	Firing rate, Hz											Data	Coefficient of variation of instantaneous frequency
	0.5	54	53	42	3	44	22	26	15			0.01	0	0	0	0	0	0				Data	untreated	apamin+ZD	apamin			baseline and after addition of channel blocker(s)						Data	untreated	apamin+ZD	apamin			baseline and after the addition of blocker(s)
	2.5		66	70	41	85	49	43	59			0.5	3.1	12	11.8	10.1	-0.5	16.5					0.672334	0.081647	2.80962			baseline	apamin+ZD		baseline	apamin			0.305	0.796	0.273			baseline	apamin + ZD		baseline	apamin
	25		100	100	100	100	100	100	100			1	51	93	70	37	47	84					2.52137	0.143307	2.27989			0.672334	0.081647		2.01111	2.80962			0.314	1.082	0.326			0.304561	0.795883		0.381427	0.272517
												2.5	87	127	104	98	77	86					2.01111	1.71388	3.52992			2.52137	0.143307		1.74529	2.27989			0.381	0.478	0.325			0.314313	1.08184		0.293945	0.326186
												5	92	119	70	136	86	89					1.68996	0.572123	2.38284			2.01111	1.71388		2.25604	3.52992			0.227	0.417	0.898			0.381427	0.477602		0.210532	0.324654
												100	95	116	87	129	90	83					1.74529	0.910002	4.24984			1.68996	0.572123		1.98464	2.38284			0.294	0.874	0.32			0.226747	0.416543		0.23626	0.898207
																							1.39793	0.682469	1.6979			1.39793	0.910002		1.77648	4.24984			0.123	1.469	1.204			0.123056	0.87423		1.24798	0.320169
																							2.25604	2.04611	2.2634			2.14978	0.682469		1.13013	1.6979			0.211	0.655	0.259			0.423639	1.46896		0.789241	1.20379
																							2.14978	1.16083	4.02316			3.57531	2.04611		1.56265	2.2634			0.424	0.165	0.484			0.287244	0.655367		0.454147	0.259485
																							3.57531		2.33573			1.29124	1.16083		3.10981	4.02316			0.287		0.724			0.175912	0.165238		0.140633	0.484163
																							1.29124		1.20464						1.09074	2.33573			0.176		0.707						1.15752	0.724279
																							1.98464								0.967846	1.20464			0.236								1.08685	0.70701
																							1.77648												1.248
																							1.13013												0.789
																							1.56265												0.454
																							3.10981												0.141
																							1.09074												1.158
																							0.967846												1.087
